# Supplementary material
Source: PubMed Central journal article supplement (PMC5822691)
Supplement: NIHMS943047-supplement-SupFigs1to6.pdf [file NIHMS943047-supplement-SupFigs1to6.pdf]

# Supplementary Figure S1.

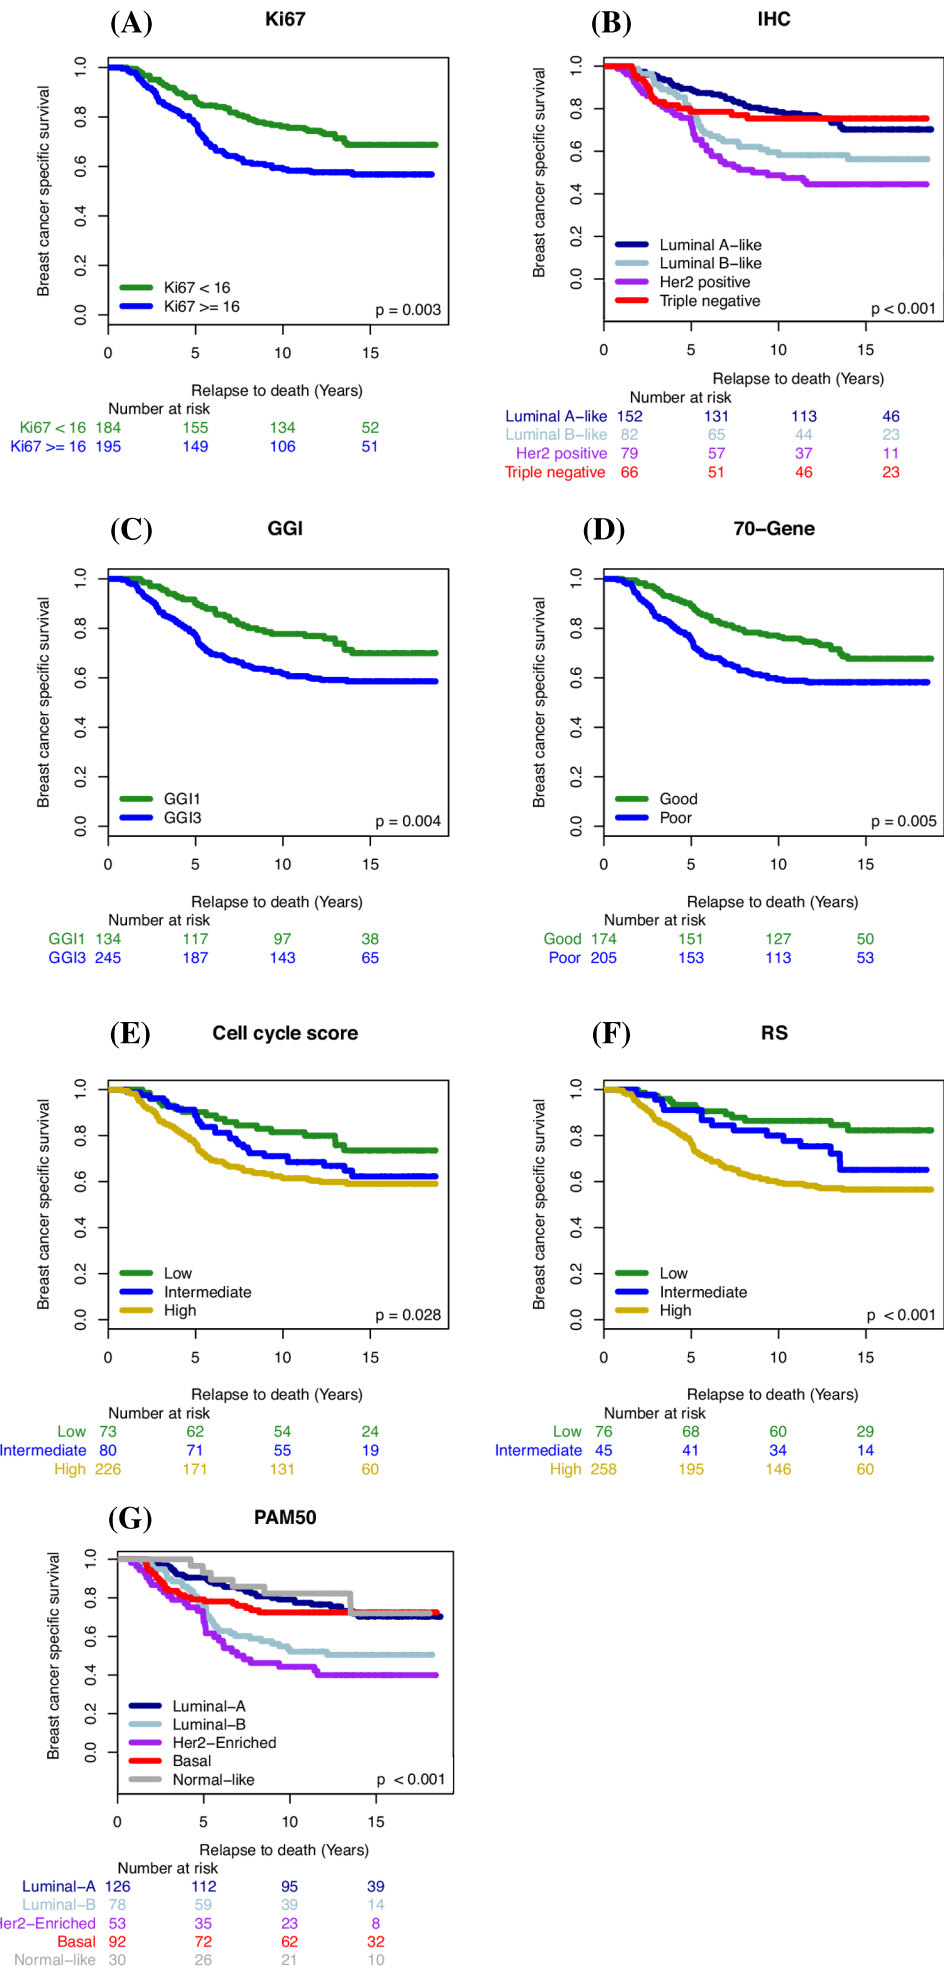

**Supplementary figure S1: Survival analysis (Kaplan–Meier estimates) with Breast cancer specific survival (BCSS) as end point for All patients of Cohort 1.**

(A). Ki67, (B) Immunohistochemical subtypes (IHC), (C) Genomic grade index (GGI), (D) 70-Gene, (E) Cell cycle score, (F) Recurrence score (RS), (G) PAM50

Supplementary figure S2.

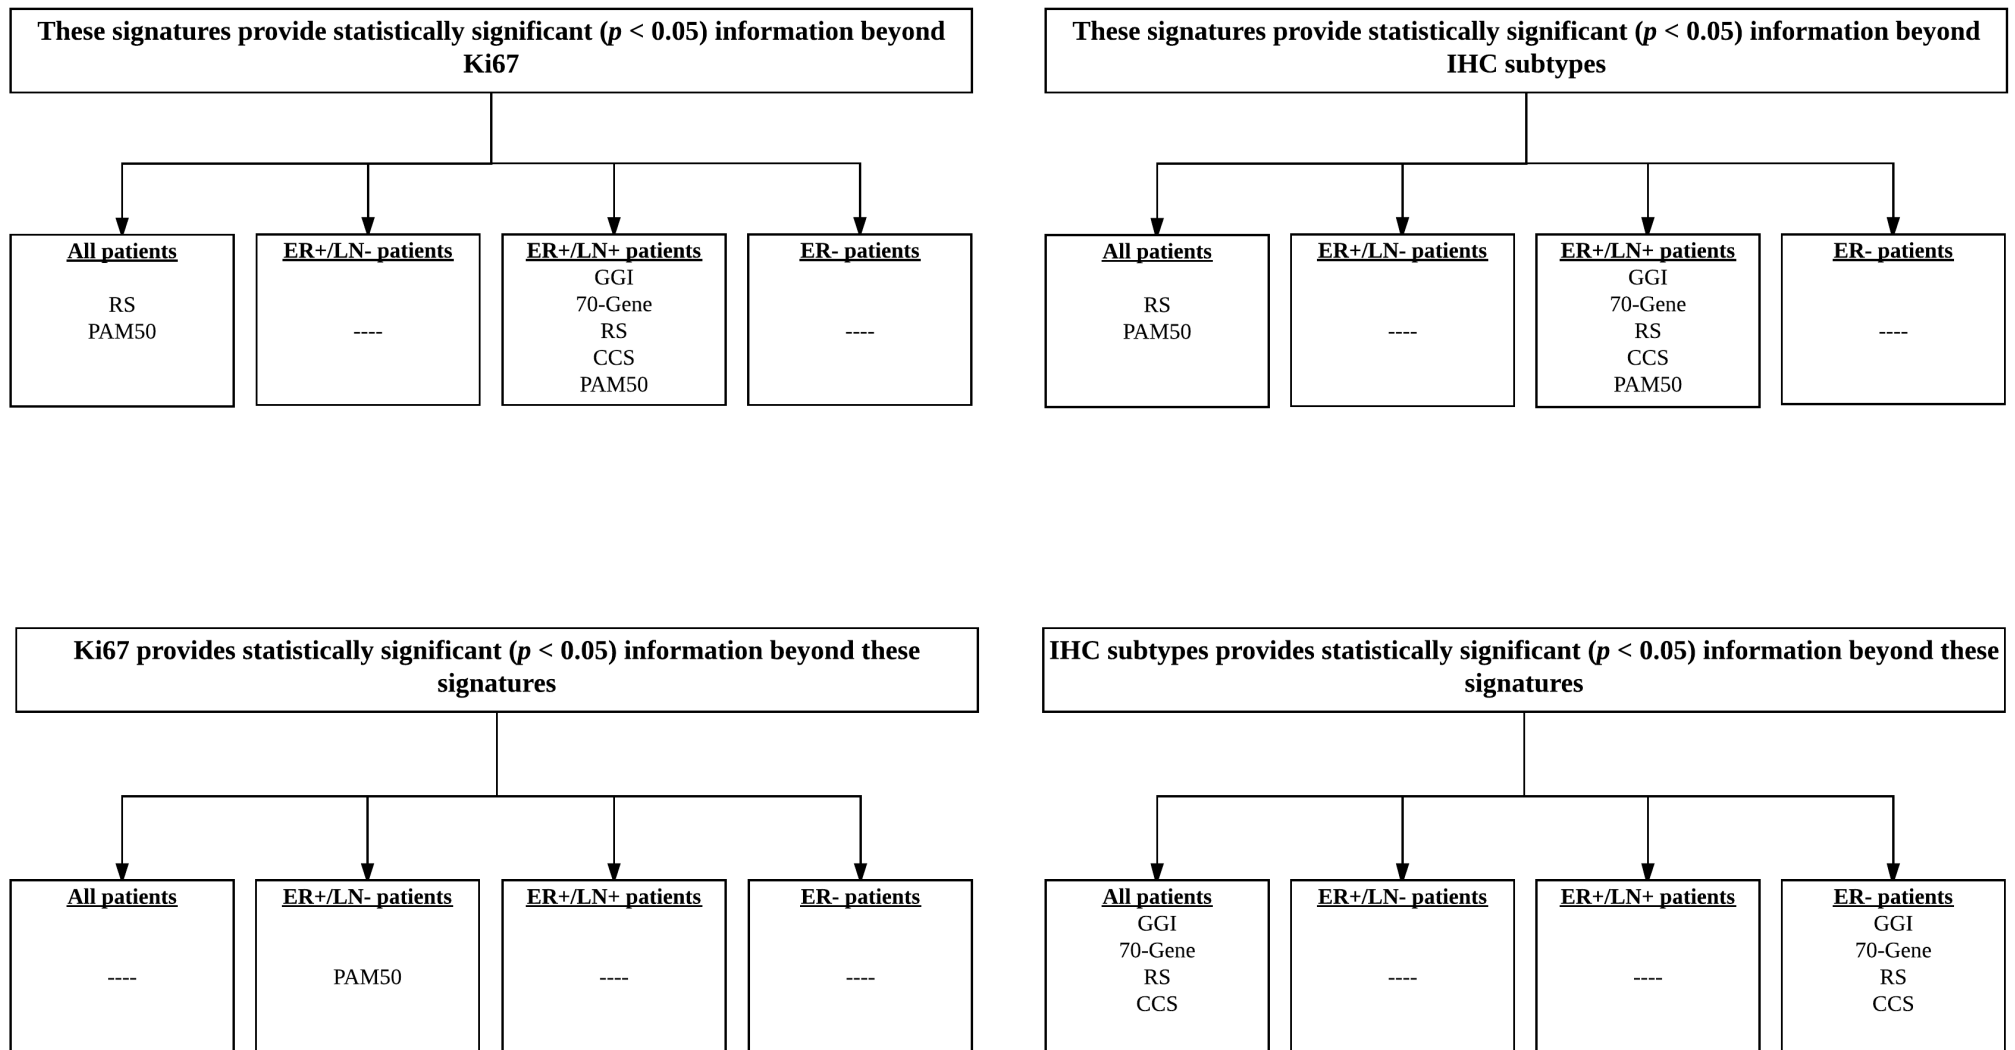

Supplementary figure S2: Flowchart showing simplified results from Cohort 1 based on likelihood ratio test ( $\Delta LR-\chi^2$ ).

GGI = Genomic grade index, RS = Recurrence score, CCS = Cell cycle score, ER+/- = Estrogen receptor positive/negative, LN+/- = Lymph node metastasis/no lymph node metastasis

# Supplementary figure S3.

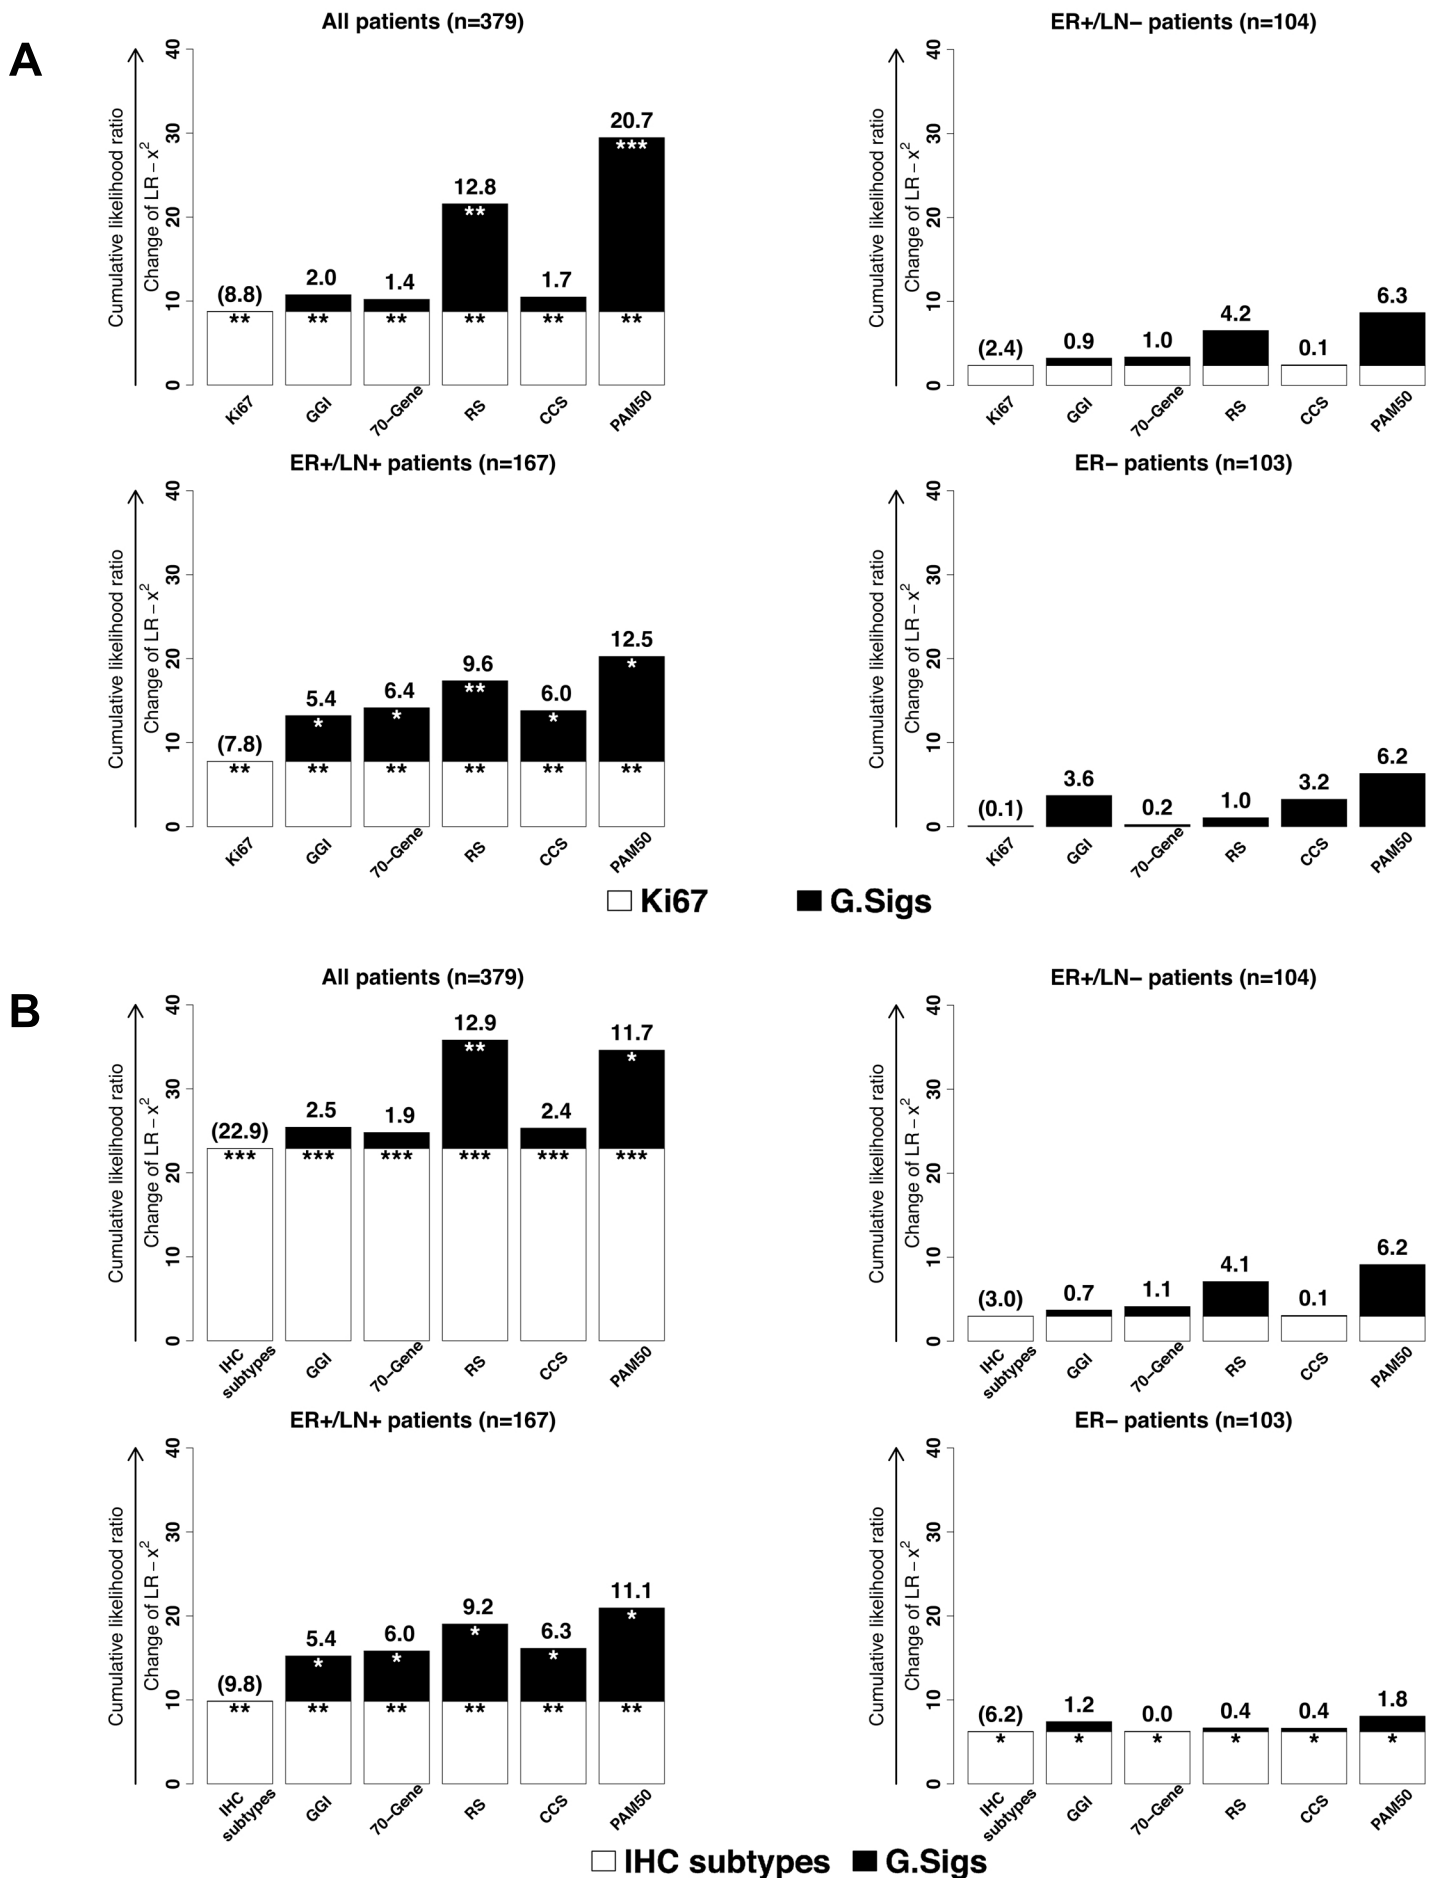

## Supplementary figure S3: Additional prognostic value of gene expression signatures beyond Ki67/IHC, Cohort 1.

The prognostic value of gene expression signatures when added to A) Ki67 and B) IHC for all, ER+/LN-, ER+/LN+, ER- patients in Cohort 1. White bars represent Ki67 or IHC, respectively, and black bars represent gene expression signatures. GGI = Genomic grade index, RS = Recurrence score, CCS = Cell cycle score, ER+/- = Estrogen receptor positive/negative, LN+/- = Lymph node metastasis/no lymph node metastasis, G.sigs = Gene expression signatures, IHC = ER/PR/HER2/Ki67.

# Supplementary figure S4.

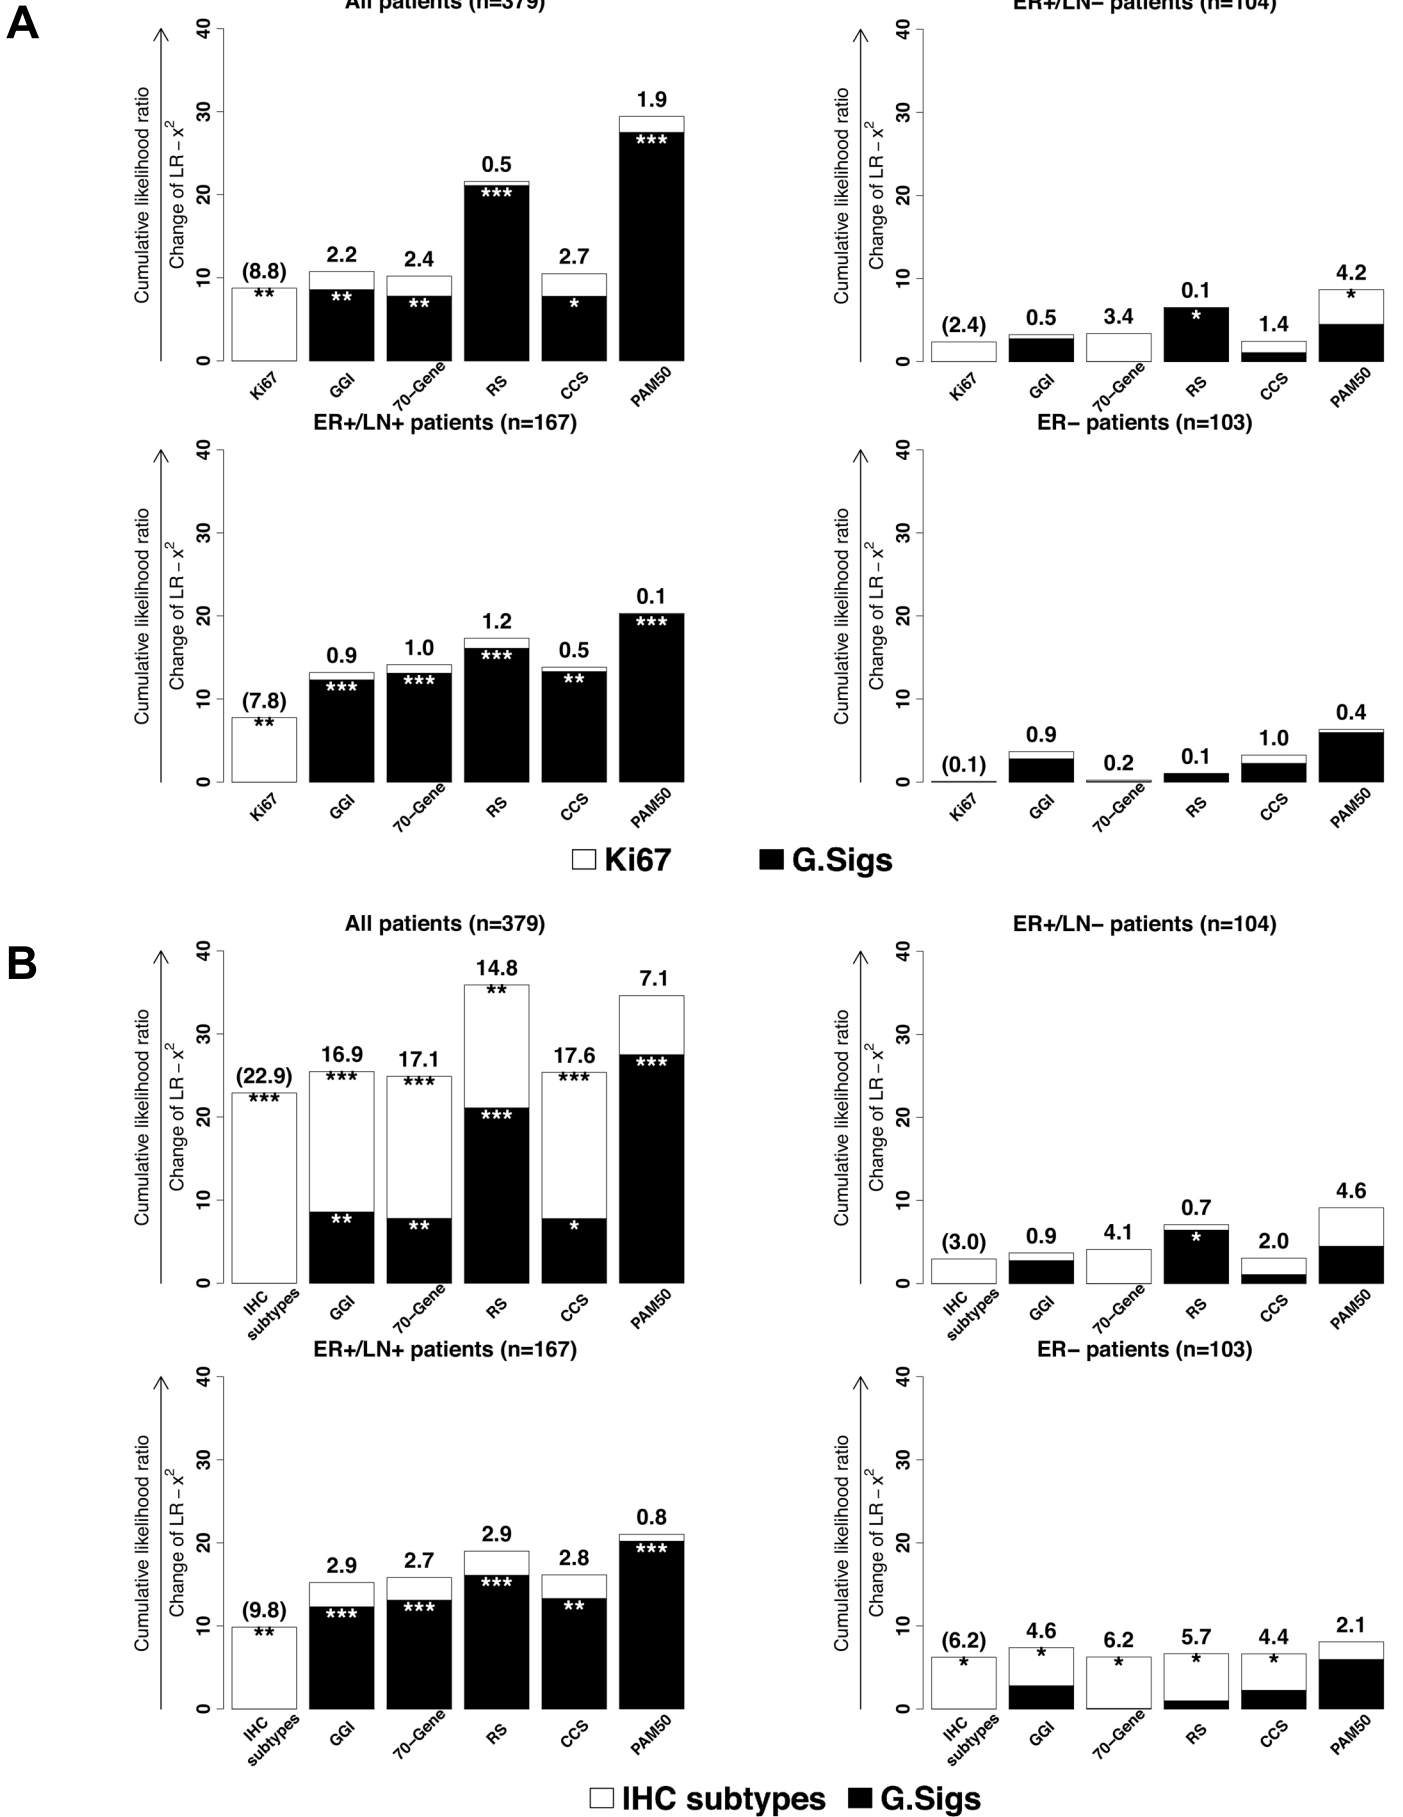

**Supplementary figure S4: Additional prognostic value of Ki67/IHC beyond gene expression signatures, Cohort 1.**

The prognostic value of A) Ki67 and B) IHC when added to gene expression signatures for all, ER+/LN-, ER+/LN+, ER- patients in Cohort 1. White bars represent Ki67 or IHC, respectively, and black bars represent gene expression signatures. GGI = Genomic grade index, RS = Recurrence score, CCS = Cell cycle score, ER+/- = Estrogen receptor positive/negative, LN+/- = Lymph node metastasis/no lymph node metastasis, G.sigs = Gene expression signatures, IHC = ER/PR/HER2/Ki67.

# Supplementary figure S5.

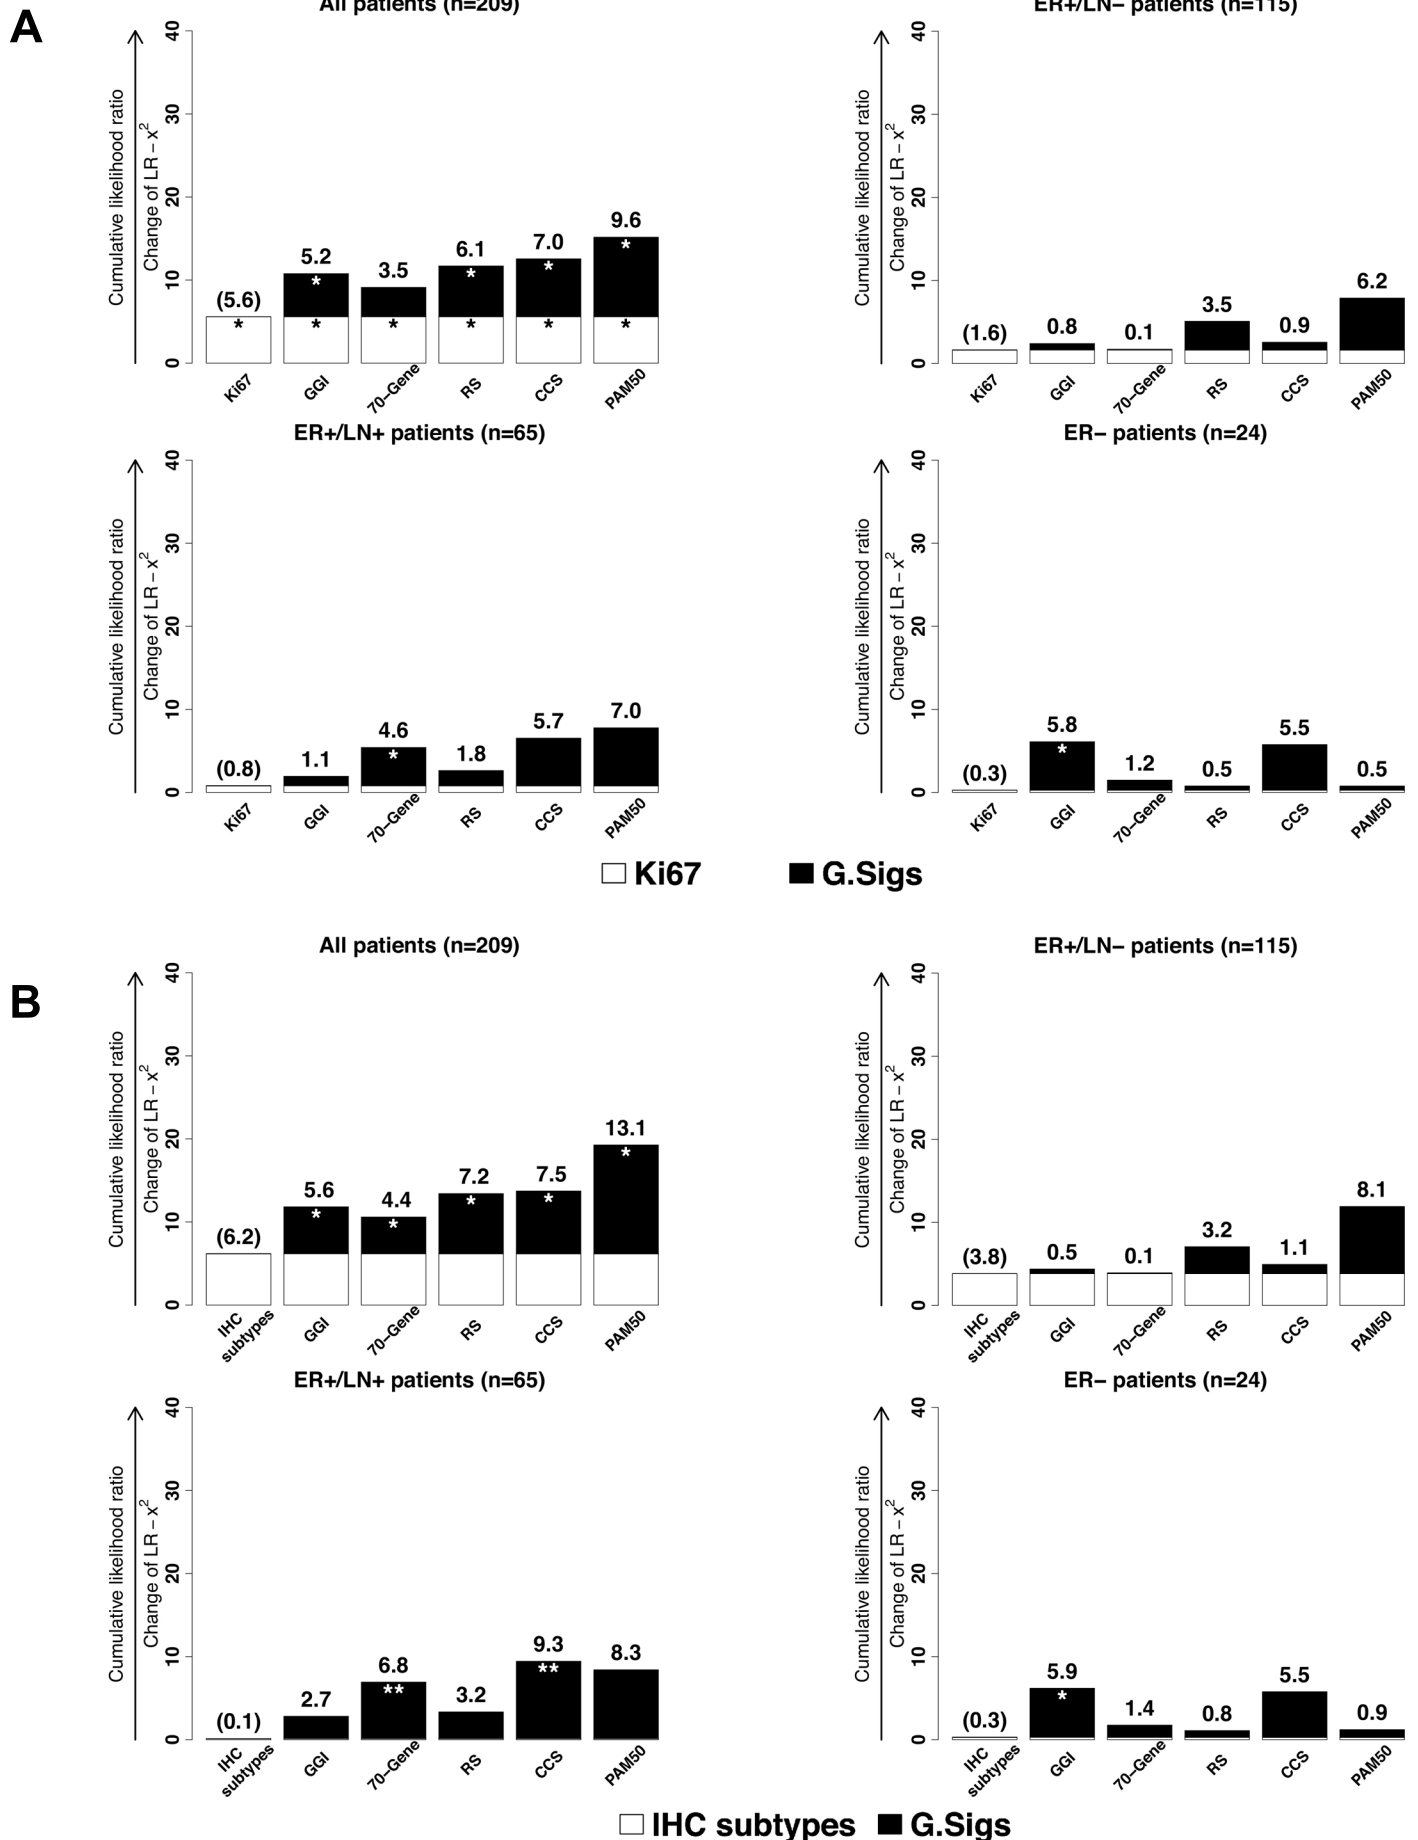

**Supplementary figure S5: Additional prognostic value of gene expression signatures beyond Ki67/IHC, Cohort 2.**

The prognostic value of gene expression signatures when added to A) Ki67 and B) IHC for all, ER+/LN-, ER+/LN+, ER- patients in Cohort 2. White bars represent Ki67 or IHC, respectively, and black bars represent gene expression signatures. GGI = Genomic grade index, RS = Recurrence score, CCS = Cell cycle score, ER+/- = Estrogen receptor positive/negative, LN+/- = Lymph node metastasis/no lymph node metastasis, G.sigs = Gene expression signatures, IHC = ER/PR/HER2/Ki67.

## Supplementary figure S6.

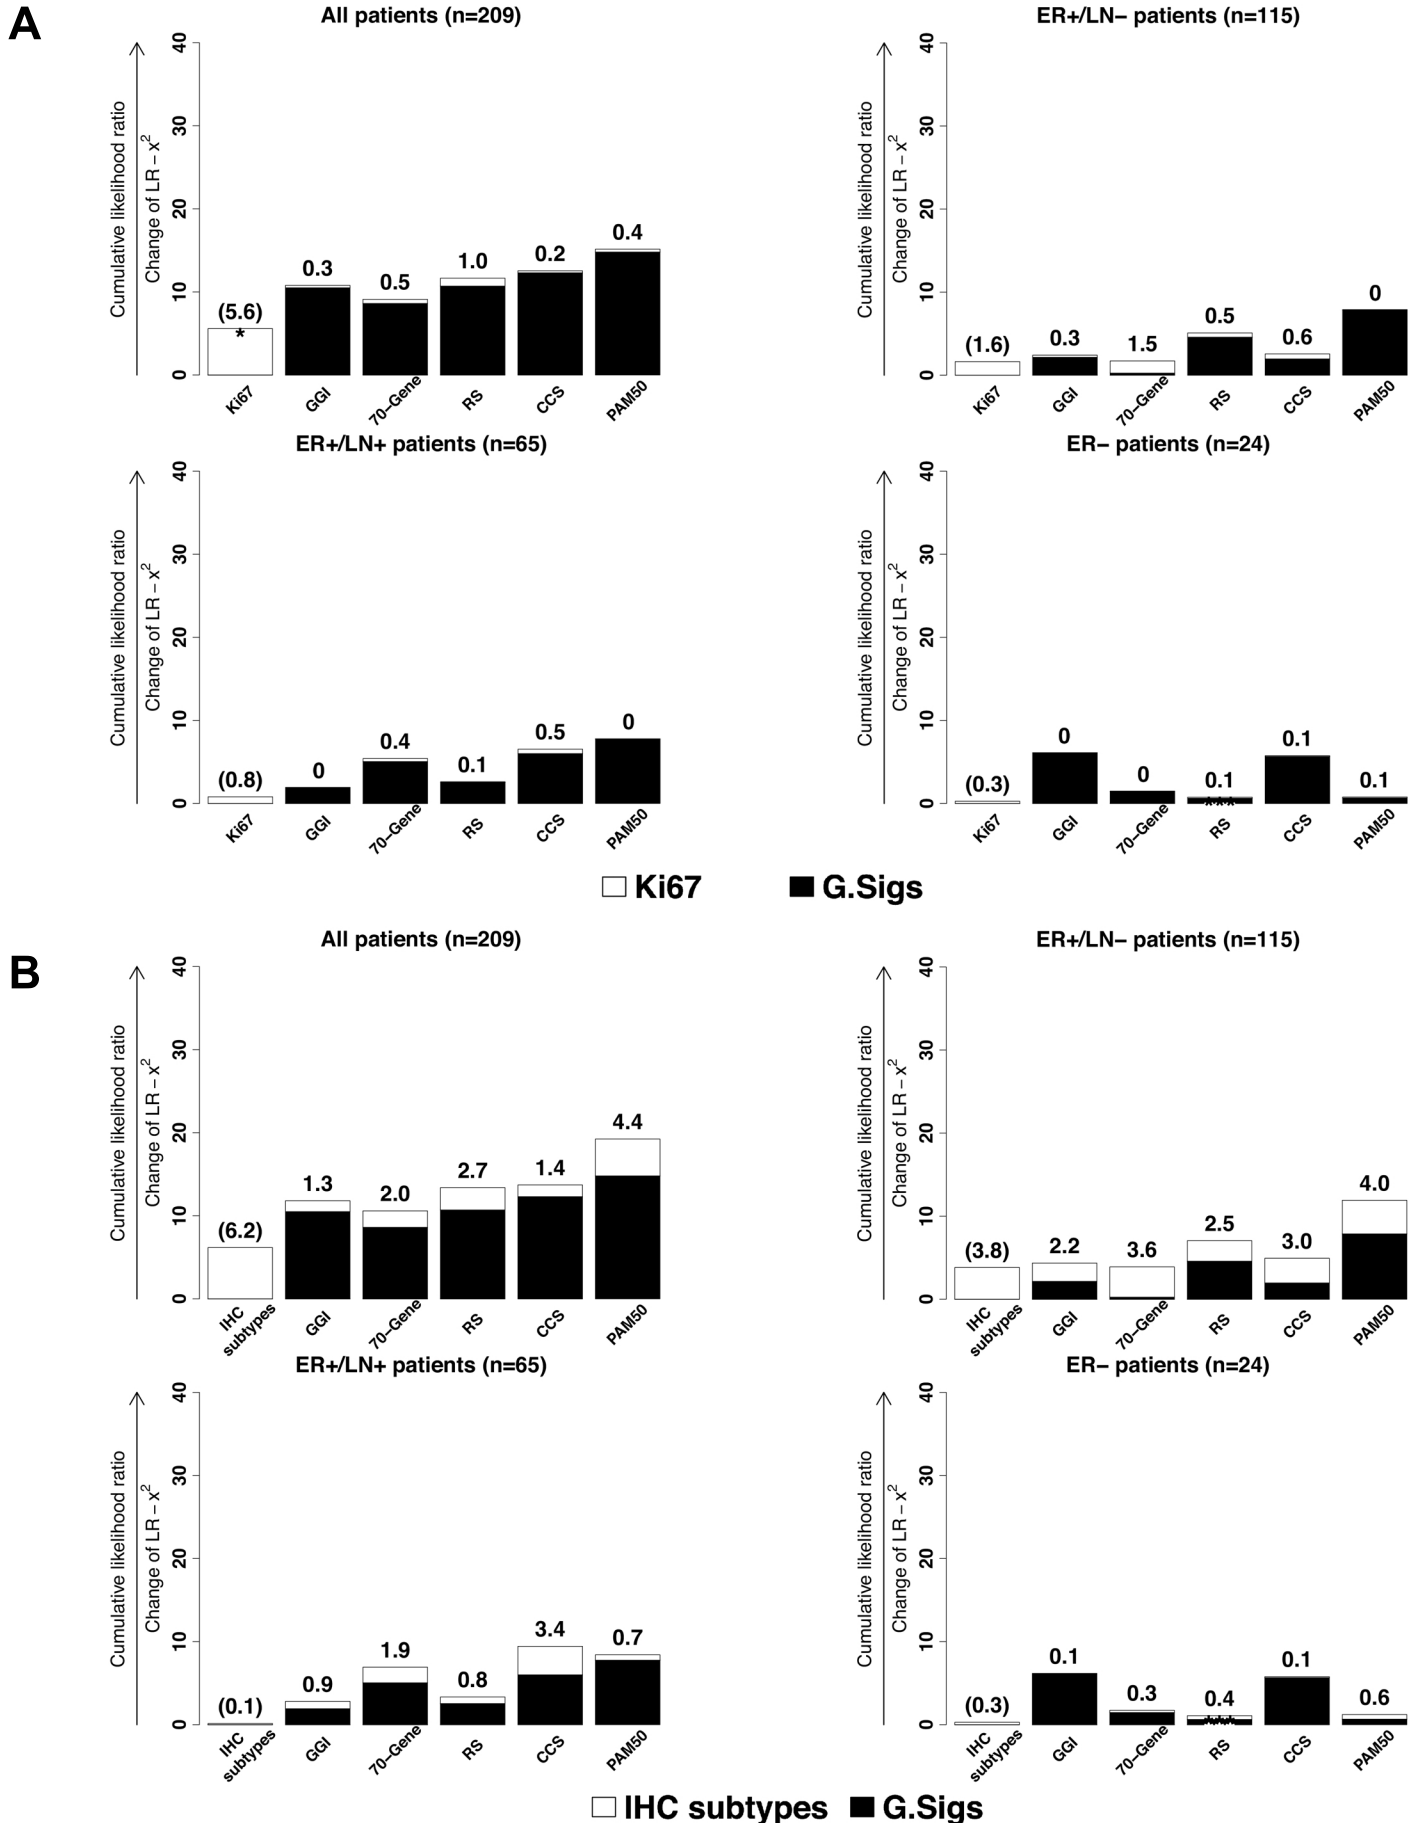

### Supplementary figure S6: Additional prognostic value of Ki67/IHC beyond gene expression signatures, Cohort 2.

The prognostic value of A) Ki67 and B) IHC when added to gene expression signatures for all, ER+/LN-, ER+/LN+, ER- patients in Cohort 2. White bars represent Ki67 or IHC, respectively, and black bars represent gene expression signatures. GGI = Genomic grade index, RS = Recurrence score, CCS = Cell cycle score, ER+/- = Estrogen receptor positive/negative, LN+/- = Lymph node metastasis/no lymph node metastasis, G.sigs = Gene expression signatures, IHC = ER/PR/HER2/Ki67.
