# Supplementary material
Source: PubMed Central journal article supplement (PMC5822691)
Supplement: NIHMS943047-supplement-SupTbls1to5.pdf [file NIHMS943047-supplement-SupTbls1to5.pdf]

**Supplementary table S1. Cell cycle genes**

|    | <b>HGNC symbol</b> | <b>Ensembl ID</b> | <b>Entrez ID</b> | <b>HGNC.ID</b> | <b>Accession Numbers</b> | <b>Approved Name</b>                                             | <b>Chr. location</b> |
|----|--------------------|-------------------|------------------|----------------|--------------------------|------------------------------------------------------------------|----------------------|
| 1  | GSK3B              | ENSG00000082701   | 2932             | 4617           | BC012760                 | glycogen synthase kinase 3 beta                                  | 3q13.3               |
| 2  | SKP2               | ENSG00000145604   | 6502             | 10901          | U33761                   | S-phase kinase-associated protein 2, E3 ubiquitin protein ligase | 5p13                 |
| 3  | ABL1               | ENSG00000097007   | 25               | 76             | M14752                   | ABL proto-oncogene 1, non-receptor tyrosine kinase               | 9q34.1               |
| 4  | CCND2              | ENSG00000118971   | 894              | 1583           | AF518005                 | cyclin D2                                                        | 12p13                |
| 5  | CCND3              | ENSG00000112576   | 896              | 1585           |                          | cyclin D3                                                        | 6p21                 |
| 6  | CCNE1              | ENSG00000105173   | 898              | 1589           | M73812                   | cyclin E1                                                        | 19q12                |
| 7  | CCNE2              | ENSG00000175305   | 9134             | 1590           | AF091433                 | cyclin E2                                                        | 8q22.1               |
| 8  | CDC25A             | ENSG00000164045   | 993              | 1725           | M81933                   | cell division cycle 25A                                          | 3p21                 |
| 9  | CDK4               | ENSG00000135446   | 1019             | 1773           | M14505                   | cyclin-dependent kinase 4                                        | 12q13                |
| 10 | CDK6               | ENSG00000105810   | 1021             | 1777           |                          | cyclin-dependent kinase 6                                        | 7q21-q22             |
| 11 | CDKN1A             | ENSG00000124762   | 1026             | 1784           | U03106                   | cyclin-dependent kinase inhibitor 1A (p21, Cip1)                 | 6p21.1               |
| 12 | CDKN1B             | ENSG00000111276   | 1027             | 1785           | AF480891                 | cyclin-dependent kinase inhibitor 1B (p27, Kip1)                 | 12p13.1-p12          |
| 13 | CDKN2A             | ENSG00000147889   | 1029             | 1787           | L27211                   | cyclin-dependent kinase inhibitor 2A                             | 9p21                 |
| 14 | E2F1               | ENSG00000101412   | 1869             | 3113           |                          | E2F transcription factor 1                                       | 20q11                |
| 15 | E2F2               | ENSG00000007968   | 1870             | 3114           | L22846                   | E2F transcription factor 2                                       | 1p36                 |
| 16 | E2F3               | ENSG00000112242   | 1871             | 3115           | Y10479                   | E2F transcription factor 3                                       | 6p22                 |
| 17 | E2F4               | ENSG00000205250   | 1874             | 3118           | BC021050                 | E2F transcription factor 4, p107/p130-binding                    | 16q22.1              |
| 18 | E2F5               | ENSG00000133740   | 1875             | 3119           | X86097                   | E2F transcription factor 5, p130-binding                         | 8q21.2               |
| 19 | HDAC1              | ENSG00000116478   | 3065             | 4852           | D50405                   | histone deacetylase 1                                            | 1p34                 |
| 20 | HDAC2              | ENSG00000196591   | 3066             | 4853           | U31814                   | histone deacetylase 2                                            | 6q21                 |
| 21 | MCM6               | ENSG00000076003   | 4175             | 6949           |                          | minichromosome maintenance complex component 6                   | 2q14-q21             |
| 22 | PTTG1              | ENSG00000164611   | 9232             | 9690           | AF062649                 | pituitary tumor-transforming 1                                   | 5q35.1               |
| 23 | RB1                | ENSG00000139687   | 5925             | 9884           | M15400                   | retinoblastoma 1                                                 | 13q14.2              |
| 24 | RBL1               | ENSG00000080839   | 5933             | 9893           | L14812                   | retinoblastoma-like 1                                            | 20q11.23             |
| 25 | SMAD3              | ENSG00000166949   | 4088             | 6769           | BC050743                 | SMAD family member 3                                             | 15q21-q22            |
| 26 | SMAD4              | ENSG00000141646   | 4089             | 6770           | U44378                   | SMAD family member 4                                             | 18q21.1              |
| 27 | TFDP1              | ENSG00000198176   | 7027             | 11749          | BC011685                 | transcription factor Dp-1                                        | 13q34                |
| 28 | TGFB1              | ENSG00000105329   | 7040             | 11766          | X02812                   | transforming growth factor, beta 1                               | 19q13.1              |
| 29 | E2F6               | ENSG00000169016   | 1876             | 3120           | AF041381                 | E2F transcription factor 6                                       | 2p25.1               |
| 30 | HDAC3              | ENSG00000171720   | 8841             | 4854           | AF059650                 | histone deacetylase 3                                            | 5q31.1-q31.2         |
| 31 | HDAC4              | ENSG00000068024   | 9759             | 14063          | AB006626                 | histone deacetylase 4                                            | 2q37.3               |
| 32 | HDAC5              | ENSG00000108840   | 10014            | 14068          | AF249731                 | histone deacetylase 5                                            | 17q21                |
| 33 | HDAC6              | ENSG00000094631   | 10013            | 14064          | AF132609                 | histone deacetylase 6                                            | Xp11.23              |
| 34 | HDAC8              | ENSG00000147099   | 55869            | 13315          | AF230097                 | histone deacetylase 8                                            | Xq13                 |

**Supplementary table S1. Cell cycle genes (continued)**

|    | <b>HGNC symbol</b> | <b>Ensembl ID</b> | <b>Entrez ID</b> | <b>HGNC.ID</b> | <b>Accession Numbers</b> | <b>Approved Name</b>                                                                    | <b>Chr. location</b> |
|----|--------------------|-------------------|------------------|----------------|--------------------------|-----------------------------------------------------------------------------------------|----------------------|
| 35 | UBE2F              | ENSG00000184182   | 140739           | 12480          | BC010549                 | ubiquitin-conjugating enzyme E2F (putative)                                             | 2q37.3               |
| 36 | HSPA8              | ENSG00000109971   | 3312             | 5241           | Y00371                   | heat shock 70kDa protein 8                                                              | 11q24.1              |
| 37 | SORBS2             | ENSG00000154556   | 8470             | 24098          |                          | sorbin and SH3 domain containing 2                                                      | 4q35.1               |
| 38 | NXF1               | ENSG00000162231   | 10482            | 8071           | AF112880                 | nuclear RNA export factor 1                                                             | 11q12-q13            |
| 39 | CDKN3              | ENSG00000100526   | 1033             | 1791           | U02681                   | cyclin-dependent kinase inhibitor 3                                                     | 14q22                |
| 40 | UBE2D3             | ENSG00000109332   | 7323             | 12476          | U39318                   | ubiquitin-conjugating enzyme E2D 3                                                      | 4q24                 |
| 41 | ZNF248             | ENSG00000198105   | 57209            | 13041          | AJ491695                 | zinc finger protein 248                                                                 | 10p11.21             |
| 42 | AFAP1              | ENSG00000196526   | 60312            | 24017          | AB209676                 | actin filament associated protein 1                                                     | 4p16                 |
| 43 | MSL1               | ENSG00000188895   | 339287           | 27905          |                          | male-specific lethal 1 homolog (Drosophila)                                             | 17q21.1              |
| 44 | GSE1               | ENSG00000131149   | 23199            | 28979          | D80004                   | Gse1 coiled-coil protein                                                                | 16q24.1              |
| 45 | TSC22D1            | ENSG00000102804   | 8848             | 16826          | AJ222700                 | TSC22 domain family, member 1                                                           | 13q14                |
| 46 | LARP1              | ENSG00000155506   | 23367            | 29531          | AB018274                 | La ribonucleoprotein domain family, member 1                                            | 5q33.2               |
| 47 | HIF1A              | ENSG00000100644   | 3091             | 4910           | U22431                   | hypoxia inducible factor 1, alpha subunit (basic helix-loop-helix transcription factor) | 14q23.2              |
| 48 | DDX58              | ENSG00000107201   | 23586            | 19102          | AF038963                 | DEAD (Asp-Glu-Ala-Asp) box polypeptide 58                                               | 9p12                 |
| 49 | ANTXR1             | ENSG00000169604   | 84168            | 21014          | AF421380                 | anthrax toxin receptor 1                                                                | 2p13.1               |
| 50 | ETV4               | ENSG00000175832   | 2118             | 3493           | U18018                   | ets variant 4                                                                           | 17q21                |
| 51 | IFIT2              | ENSG00000119922   | 3433             | 5409           | M14660                   | interferon-induced protein with tetratricopeptide repeats 2                             | 10q23.31             |
| 52 | SEPHS1             | ENSG00000086475   | 22929            | 19685          | BC000941                 | selenophosphate synthetase 1                                                            | 10p14                |
| 53 | DYNLL1             | ENSG00000088986   | 8655             | 15476          | U32944                   | dynein, light chain, LC8-type 1                                                         | 12q24.23             |
| 54 | SLC39A10           | ENSG00000196950   | 57181            | 20861          |                          | solute carrier family 39 (zinc transporter), member 10                                  | 2q33.1               |
| 55 | NCOA3              | ENSG00000124151   | 8202             | 7670           | AF012108                 | nuclear receptor coactivator 3                                                          | 20q12                |
| 56 | CNIH4              | ENSG00000143771   | 29097            | 25013          |                          | cornichon family AMPA receptor auxiliary protein 4                                      | 1q42.12              |
| 57 | DNAJB6             | ENSG00000105993   | 10049            | 14888          | AB014888                 | DnaJ (Hsp40) homolog, subfamily B, member 6                                             | 7q36.3               |
| 58 | DKC1               | ENSG00000130826   | 1736             | 2890           | AJ224481                 | dyskeratosis congenita 1, dyskerin                                                      | Xq28                 |
| 59 | AOC2               | ENSG00000131480   | 314              | 549            | AF081363                 | amine oxidase, copper containing 2 (retina-specific)                                    | 17q21                |
| 60 | XPR1               | ENSG00000143324   | 9213             | 12827          | AF099082                 | xenotropic and polytropic retrovirus receptor 1                                         | 1q25.1               |
| 61 | RPL37              | ENSG00000145592   | 6167             | 10347          | L11567                   | ribosomal protein L37                                                                   | 5p13.1               |
| 62 | OPN3               | ENSG00000054277   | 23596            | 14007          | AF140242                 | opsin 3                                                                                 | 1q43                 |
| 63 | KMO                | ENSG00000117009   | 8564             | 6381           | AF056032                 | kynurenine 3-monooxygenase (kynurenine 3-hydroxylase)                                   | 1q42-q44             |
| 64 | TMED7              | ENSG00000134970   | 51014            | 24253          | AK074962                 | transmembrane emp24 protein transport domain containing 7                               | 5q22.3               |
| 65 | GRPEL1             | ENSG00000109519   | 80273            | 19696          | AF070525                 | GrpE-like 1, mitochondrial (E. coli)                                                    | 4p16                 |
| 66 | ZCCHC14            | ENSG00000140948   | 23174            | 24134          | AB011151                 | zinc finger, CCHC domain containing 14                                                  | 16q24.2              |
| 67 | NR2F6              | ENSG00000160113   | 2063             | 7977           | X12794                   | nuclear receptor subfamily 2, group F, member 6                                         | 19p13.11             |

**Supplementary table S1. Cell cycle genes (continued)**

|    | <b>HGNC symbol</b> | <b>Ensembl ID</b> | <b>Entrez ID</b> | <b>HGNC.ID</b> | <b>Accession Numbers</b> | <b>Approved Name</b>                                                          | <b>Chr. location</b> |
|----|--------------------|-------------------|------------------|----------------|--------------------------|-------------------------------------------------------------------------------|----------------------|
| 68 | FAM189B            | ENSG00000160767   | 10712            | 1233           | AF070550                 | family with sequence similarity 189, member B                                 | 1q21                 |
| 69 | FAM84B             | ENSG00000168672   | 157638           | 24166          | AJ417849                 | family with sequence similarity 84, member B                                  | 8q24.13              |
| 70 | HSPA4              | ENSG00000170606   | 3308             | 5237           | AB023420                 | heat shock 70kDa protein 4                                                    | 5q31.1               |
| 71 | HIST2H2BE          | ENSG00000184678   | 8349             | 4760           | AY131979                 | histone cluster 2, H2be                                                       | 1q21.2               |
| 72 | SLC1A3             | ENSG00000079215   | 6507             | 10941          |                          | solute carrier family 1 (glial high affinity glutamate transporter), member 3 | 5p13                 |
| 73 | RSRP1              | ENSG00000117616   | 57035            | 25234          |                          | arginine/serine-rich protein 1                                                | 1p36.13-p35.1        |
| 74 | HORMAD1            | ENSG00000143452   | 84072            | 25245          | AL136755                 | HORMA domain containing 1                                                     | 1q21.2               |
| 75 | XBP1               | ENSG00000100219   | 7494             | 12801          | M31627                   | X-box binding protein 1                                                       | 22q12.1              |
| 76 | SLBP               | ENSG00000163950   | 7884             | 10904          | Z71188                   | stem-loop binding protein                                                     | 4p16.3               |
| 77 | CDCA7              | ENSG00000144354   | 83879            | 14628          | BG354580                 | cell division cycle associated 7                                              | 2q31.1               |
| 78 | UNG                | ENSG00000076248   | 7374             | 12572          | A64377                   | uracil-DNA glycosylase                                                        | 12q23-q24.1          |
| 79 | ZNF367             | ENSG00000165244   | 195828           | 18320          | AK091289                 | zinc finger protein 367                                                       | 9q22                 |
| 80 | PLCXD1             | ENSG00000182378   | 55344            | 23148          | AK002185                 | phosphatidylinositol-specific phospholipase C, X domain containing 1          | Xp22.33 and Yp11.32  |
| 81 | ZRANB2             | ENSG00000132485   | 9406             | 13058          | AF065391                 | zinc finger, RAN-binding domain containing 2                                  | 1p31                 |
| 82 | NASP               | ENSG00000132780   | 4678             | 7644           | M97856                   | nuclear autoantigenic sperm protein (histone-binding)                         | 1p34.1               |
| 83 | INTS8              | ENSG00000164941   | 55656            | 26048          | AK091278                 | integrator complex subunit 8                                                  | 8q22.1               |
| 84 | DTL                | ENSG00000143476   | 51514            | 30288          | AF195765                 | denticleless E3 ubiquitin protein ligase homolog (Drosophila)                 | 1q32                 |
| 85 | TRMT2A             | ENSG00000099899   | 27037            | 24974          | BC017184                 | tRNA methyltransferase 2 homolog A (S. cerevisiae)                            | 22q11.21             |
| 86 | ALKBH7             | ENSG00000125652   | 84266            | 21306          | AY427650                 | alkB, alkylation repair homolog 7 (E. coli)                                   | 19p13.3              |
| 87 | IVNS1ABP           | ENSG00000116679   | 10625            | 16951          | AB020657                 | influenza virus NS1A binding protein                                          | 1q25.1-q31.1         |
| 88 | MAP2K6             | ENSG00000108984   | 5608             | 6846           | U39064                   | mitogen-activated protein kinase kinase 6                                     | 17q                  |
| 89 | ANAPC1             | ENSG00000153107   | 64682            | 19988          | AJ278357                 | anaphase promoting complex subunit 1                                          | 2q12.1               |
| 90 | ANAPC11            | ENSG00000141552   | 51529            | 14452          | AF247565                 | anaphase promoting complex subunit 11                                         | 17q25.3              |
| 91 | ANAPC13            | ENSG00000129055   | 25847            | 24540          | AF086169                 | anaphase promoting complex subunit 13                                         | 3q22.1               |
| 92 | ANAPC2             | ENSG00000176248   | 29882            | 19989          | AB037827                 | anaphase promoting complex subunit 2                                          | 9q34.3               |
| 93 | ANAPC4             | ENSG00000053900   | 29945            | 19990          | AF191338                 | anaphase promoting complex subunit 4                                          | 4p15.31              |
| 94 | ANAPC7             | ENSG00000196510   | 51434            | 17380          | AF191340                 | anaphase promoting complex subunit 7                                          | 12q13.12             |
| 95 | CDC26              | ENSG00000176386   | 246184           | 17839          | AF503918                 | cell division cycle 26                                                        | 9q32                 |
| 96 | MYC                | ENSG00000136997   | 4609             | 7553           |                          | v-myc avian myelocytomatosis viral oncogene homolog                           | 8q24                 |
| 97 | RBL2               | ENSG00000103479   | 5934             | 9894           | X74594                   | retinoblastoma-like 2                                                         | 16q12.2              |
| 98 | SKP1               | ENSG00000113558   | 6500             | 10899          | U33760                   | S-phase kinase-associated protein 1                                           | 5q31                 |
| 99 | TGFB2              | ENSG00000092969   | 7042             | 11768          | M19154                   | transforming growth factor, beta 2                                            | 1q41                 |

**Supplementary table S1. Cell cycle genes (continued)**

|     | <b>HGNC symbol</b> | <b>Ensembl ID</b> | <b>Entrez ID</b> | <b>HGNC.ID</b> | <b>Accession Numbers</b> | <b>Approved Name</b>                                                     | <b>Chr. location</b> |
|-----|--------------------|-------------------|------------------|----------------|--------------------------|--------------------------------------------------------------------------|----------------------|
| 100 | TGFB3              | ENSG00000119699   | 7043             | 11769          |                          | transforming growth factor, beta 3                                       | 14q24                |
| 101 | CDC6               | ENSG00000094804   | 990              | 1744           | U77949                   | cell division cycle 6                                                    | 17q21.3              |
| 102 | CDK2               | ENSG00000123374   | 1017             | 1771           | M68520                   | cyclin-dependent kinase 2                                                | 12q13                |
| 103 | MCM2               | ENSG00000073111   | 4171             | 6944           | X67334                   | minichromosome maintenance complex component 2                           | 3q21                 |
| 104 | MCM5               | ENSG00000100297   | 4174             | 6948           |                          | minichromosome maintenance complex component 5                           | 22q13.1-q13.2        |
| 105 | ORC1               | ENSG00000085840   | 4998             | 8487           |                          | origin recognition complex, subunit 1                                    | 1p32                 |
| 106 | PCNA               | ENSG00000132646   | 5111             | 8729           | J04718                   | proliferating cell nuclear antigen                                       | 20p13-p12.3          |
| 107 | PKMYT1             | ENSG00000127564   | 9088             | 29650          | AK097642                 | protein kinase, membrane associated tyrosine/threonine 1                 | 16p13.3              |
| 108 | MBOAT1             | ENSG00000172197   | 154141           | 21579          | AK093994                 | membrane bound O-acyltransferase domain containing 1                     | 6p22.3               |
| 109 | SERPINB4           | ENSG00000206073   | 6318             | 10570          | X89015                   | serpin peptidase inhibitor, clade B (ovalbumin), member 4                | 18q21.33             |
| 110 | CREBZF             | ENSG00000137504   | 58487            | 24905          | AF039942                 | CREB/ATF bZIP transcription factor                                       | 11q14.1              |
| 111 | GMNN               | ENSG00000112312   | 51053            | 17493          | AF067855                 | geminin, DNA replication inhibitor                                       | 6p21.32              |
| 112 | MSH2               | ENSG00000095002   | 4436             | 7325           | U03911                   | mutS homolog 2                                                           | 2p21                 |
| 113 | WDR76              | ENSG00000092470   | 79968            | 25773          | AK023035                 | WD repeat domain 76                                                      | 15q15.3              |
| 114 | ATRIP              |                   | 84126            | 33499          | AF451323                 | ATR interacting protein                                                  | 3p21.31              |
| 115 | UBR5               | ENSG00000104517   | 51366            | 16806          | AF006010                 | ubiquitin protein ligase E3 component n-recogin 5                        | 8q22                 |
| 116 | FAM111B            | ENSG00000189057   | 374393           | 24200          | BC062456                 | family with sequence similarity 111, member B                            | 11q12.1              |
| 117 | GINS2              | ENSG00000131153   | 51659            | 24575          | BC003186                 | GINS complex subunit 2 (Psf2 homolog)                                    | 16q24.1              |
| 118 | ANKRD10            | ENSG00000088448   | 55608            | 20265          | AK000100                 | ankyrin repeat domain 10                                                 | 13q33.3              |
| 119 | DNAH11             | ENSG00000105877   | 8701             | 2942           | U83569                   | dynein, axonemal, heavy chain 11                                         | 7p21                 |
| 120 | ZNF414             | ENSG00000133250   | 84330            | 20630          | AK074191                 | zinc finger protein 414                                                  | 19p13.2              |
| 121 | ARGLU1             | ENSG00000134884   | 55082            | 25482          | BC071587                 | arginine and glutamate rich 1                                            | 13q33.3              |
| 122 | CDCA7L             | ENSG00000164649   | 55536            | 30777          |                          | cell division cycle associated 7-like                                    | 7p15.3               |
| 123 | FAM214A            | ENSG00000047346   | 56204            | 25609          | AB037791                 | family with sequence similarity 214, member A                            | 15q21.2-q21.3        |
| 124 | POLD3              | ENSG00000077514   | 10714            | 20932          | D26018                   | polymerase (DNA-directed), delta 3, accessory subunit                    | 11q14                |
| 125 | RUNX1              | ENSG00000159216   | 861              | 10471          | X79549                   | runt-related transcription factor 1                                      | 21q22.3              |
| 126 | CHAF1B             | ENSG00000159259   | 8208             | 1911           | U20980                   | chromatin assembly factor 1, subunit B (p60)                             | 21q22.2              |
| 127 | UBR7               | ENSG00000012963   | 55148            | 20344          | AK001345                 | ubiquitin protein ligase E3 component n-recogin 7 (putative)             | 14q32.12             |
| 128 | RFC4               | ENSG00000163918   | 5984             | 9972           |                          | replication factor C (activator 1) 4, 37kDa                              | 3q27                 |
| 129 | FEN1               | ENSG00000168496   | 2237             | 3650           | L37374                   | flap structure-specific endonuclease 1                                   | 11q12                |
| 130 | DONSON             | ENSG00000159147   | 29980            | 2993           | AF000002                 | downstream neighbor of SON                                               | 21q22.1              |
| 131 | CLSPN              | ENSG00000092853   | 63967            | 19715          | AF297866                 | claspin                                                                  | 1p34.3               |
| 132 | PAQR4              | ENSG00000162073   | 124222           | 26386          |                          | progesterin and adipoQ receptor family member IV                         | 16p13                |
| 133 | SLC25A29           | ENSG00000197119   | 123096           | 20116          | AK095532                 | solute carrier family 25 (mitochondrial carnitine/acylcarnitine carrier) | 14q32.2              |

**Supplementary table S1. Cell cycle genes (continued)**

|     | <b>HGNC symbol</b> | <b>Ensembl ID</b> | <b>Entrez ID</b> | <b>HGNC.ID</b> | <b>Accession Numbers</b> | <b>Approved Name</b>                                      | <b>Chr. location</b> |
|-----|--------------------|-------------------|------------------|----------------|--------------------------|-----------------------------------------------------------|----------------------|
| 134 | DSCC1              | ENSG00000136982   | 79075            | 24453          |                          | DNA replication and sister chromatid cohesion 1           | 8q24.12              |
| 135 | RBBP8              | ENSG00000101773   | 5932             | 9891           | AF043431                 | retinoblastoma binding protein 8                          | 18q11.2              |
| 136 | ANAPC10            | ENSG00000164162   | 10393            | 24077          | AF132794                 | anaphase promoting complex subunit 10                     | 4q31                 |
| 137 | CCND1              | ENSG00000110092   | 595              | 1582           | Z23022                   | cyclin D1                                                 | 11q13                |
| 138 | CDKN2D             | ENSG00000129355   | 1032             | 1790           |                          | cyclin-dependent kinase inhibitor 2D (p19, inhibits CDK4) | 19p13                |
| 139 | CREBBP             | ENSG00000005339   | 1387             | 2348           | U85962                   | CREB binding protein                                      | 16p13.3              |
| 140 | CUL1               | ENSG00000055130   | 8454             | 2551           | U58087                   | cullin 1                                                  | 7q36.1               |
| 141 | DBF4               | ENSG00000006634   | 10926            | 17364          | AF160876                 | DBF4 zinc finger                                          | 7q21.3               |
| 142 | RBX1               | ENSG00000100387   | 9978             | 9928           | AF140598                 | ring-box 1, E3 ubiquitin protein ligase                   | 22q13.2              |
| 143 | SMAD2              | ENSG00000175387   | 4087             | 6768           | U65019                   | SMAD family member 2                                      | 18q21                |
| 144 | ATM                | ENSG00000149311   | 472              | 795            | AB209133                 | ATM serine/threonine kinase                               | 11q22-q23            |
| 145 | ATR                | ENSG00000175054   | 545              | 882            | U76308                   | ATR serine/threonine kinase                               | 3q23                 |
| 146 | CCNH               | ENSG00000134480   | 902              | 1594           | U12685                   | cyclin H                                                  | 5q13.3-q14           |
| 147 | CDC7               | ENSG00000097046   | 8317             | 1745           | AF015592                 | cell division cycle 7                                     | 1p22                 |
| 148 | EP300              | ENSG00000100393   | 2033             | 3373           | U01877                   | E1A binding protein p300                                  | 22q13.2              |
| 149 | GADD45A            | ENSG00000116717   | 1647             | 4095           | M60974                   | growth arrest and DNA-damage-inducible, alpha             | 1p31.2               |
| 150 | MCM3               | ENSG00000112118   | 4172             | 6945           | X62153                   | minichromosome maintenance complex component 3            | 6p12                 |
| 151 | MCM7               | ENSG00000166508   | 4176             | 6950           |                          | minichromosome maintenance complex component 7            | 7q21.3-q22.1         |
| 152 | MDM2               | ENSG00000135679   | 4193             | 6973           |                          | MDM2 proto-oncogene, E3 ubiquitin protein ligase          | 12q13-q14            |
| 153 | ORC2               | ENSG00000115942   | 4999             | 8488           |                          | origin recognition complex, subunit 2                     | 2q33                 |
| 154 | ORC3               | ENSG00000135336   | 23595            | 8489           | AF093535                 | origin recognition complex, subunit 3                     | 6q                   |
| 155 | ORC4               | ENSG00000115947   | 5000             | 8490           | AF022108                 | origin recognition complex, subunit 4                     | 2q22-q23             |
| 156 | ORC5               | ENSG00000164815   | 5001             | 8491           |                          | origin recognition complex, subunit 5                     | 7q22.1               |
| 157 | ORC6               | ENSG00000091651   | 23594            | 17151          | AF139658                 | origin recognition complex, subunit 6                     | 16q12                |
| 158 | PRKDC              | ENSG00000253729   | 5591             | 9413           |                          | protein kinase, DNA-activated, catalytic polypeptide      | 8q11                 |
| 159 | TP53               | ENSG00000141510   | 7157             | 11998          | AF307851                 | tumor protein p53                                         | 17p13.1              |
| 160 | ARF1               | ENSG00000143761   | 375              | 652            | M84326                   | ADP-ribosylation factor 1                                 | 1q42.13              |
| 161 | MCM10              | ENSG00000065328   | 55388            | 18043          | AB042719                 | minichromosome maintenance complex component 10           | 10p13                |
| 162 | MCM8               | ENSG00000125885   | 84515            | 16147          | AJ439063                 | minichromosome maintenance complex component 8            | 20p12.3              |
| 163 | MCM9               | ENSG00000111877   | 254394           | 21484          | BC031658                 | minichromosome maintenance complex component 9            | 6q22.31              |
| 164 | CDKN2AIP           | ENSG00000168564   | 55602            | 24325          | AK000043                 | CDKN2A interacting protein                                | 4q35.1               |
| 165 | HELLS              | ENSG00000119969   | 3070             | 4861           | AF155827                 | helicase, lymphoid-specific                               | 10q24.2              |
| 166 | TOPBP1             | ENSG00000163781   | 11073            | 17008          | AB019397                 | topoisomerase (DNA) II binding protein 1                  | 3q22.1               |
| 167 | HSPB8              | ENSG00000152137   | 26353            | 30171          | AF191017                 | heat shock 22kDa protein 8                                | 12q24.23             |

**Supplementary table S1. Cell cycle genes (continued)**

|     | HGNC symbol | Ensembl ID      | Entrez ID | HGNC.ID | Accession Numbers     | Approved Name                                                               | Chr. location |
|-----|-------------|-----------------|-----------|---------|-----------------------|-----------------------------------------------------------------------------|---------------|
| 168 | ATAD2       | ENSG00000156802 | 29028     | 30123   | BC019909              | ATPase family, AAA domain containing 2                                      | 8q24.13       |
| 169 | WDR90       | ENSG00000161996 | 197335    | 26960   | AB067511              | WD repeat domain 90                                                         | 16p13.3       |
| 170 | RFC2        | ENSG00000049541 | 5982      | 9970    |                       | replication factor C (activator 1) 2, 40kDa                                 | 7q11.23       |
| 171 | CENPU       | ENSG00000151725 | 79682     | 21348   | AK027121,<br>AF516710 | centromere protein U                                                        | 4q35.1        |
| 172 | LIPH        | ENSG00000163898 | 200879    | 18483   | AY093498              | lipase, member H                                                            | 3q27          |
| 173 | ABCC5       | ENSG00000114770 | 10057     | 56      | AF104942              | ATP-binding cassette, sub-family C (CFTR/MRP), member 5                     | 3q27          |
| 174 | CENPQ       | ENSG00000031691 | 55166     | 21347   | AK001407              | centromere protein Q                                                        | 6p12.3        |
| 175 | USP1        | ENSG00000162607 | 7398      | 12607   |                       | ubiquitin specific peptidase 1                                              | 1p31.3        |
| 176 | IER5        | ENSG00000162783 | 51278     | 5393    | BC000128              | immediate early response 5                                                  | 1q25.3        |
| 177 | EFHC1       | ENSG00000096093 | 114327    | 16406   | AK001328              | EF-hand domain (C-terminal) containing 1                                    | 6p12.3        |
| 178 | RHPN1       | ENSG00000158106 | 114822    | 19973   | AB067516              | rhophilin, Rho GTPase binding protein 1                                     | 8q24.3        |
| 179 | RAD54L      | ENSG00000085999 | 8438      | 9826    | X97795                | RAD54-like (S. cerevisiae)                                                  | 1p32          |
| 180 | ACTR2       | ENSG00000138071 | 10097     | 169     | AF006082              | ARP2 actin-related protein 2 homolog (yeast)                                | 2p14          |
| 181 | E2F8        | ENSG00000129173 | 79733     | 24727   |                       | E2F transcription factor 8                                                  | 11p15         |
| 182 | DHFRL1      | ENSG00000178700 | 200895    | 27309   | AL832912              | dihydrofolate reductase-like 1                                              | 3q11.2        |
| 183 | ASF1B       | ENSG00000105011 | 55723     | 20996   | AF279307              | anti-silencing function 1B histone chaperone                                | 19p13.12      |
| 184 | CDH24       | ENSG00000139880 | 64403     | 14265   | AL137477              | cadherin 24, type 2                                                         | 14q11.2       |
| 185 | MASTL       | ENSG00000120539 | 84930     | 19042   | BC009107              | microtubule associated serine/threonine kinase-like                         | 10p12.1       |
| 186 | TCEB3       | ENSG00000011007 | 6924      | 11620   | L47345                | transcription elongation factor B (SIII), polypeptide 3 (110kDa, elongin A) | 1p36.1        |
| 187 | EXO1        | ENSG00000174371 | 9156      | 3511    | AF042282              | exonuclease 1                                                               | 1q43          |
| 188 | EZH2        | ENSG00000106462 | 2146      | 3527    |                       | enhancer of zeste 2 polycomb repressive complex 2 subunit                   | 7q35-q36      |
| 189 | SH3GL2      | ENSG00000107295 | 6456      | 10831   | X99657                | SH3-domain GRB2-like 2                                                      | 9p22          |
| 190 | C5orf42     | ENSG00000197603 | 65250     | 25801   |                       | chromosome 5 open reading frame 42                                          | 5p13.2        |
| 191 | BRCA1       | ENSG00000012048 | 672       | 1100    | U14680                | breast cancer 1, early onset                                                | 17q21.31      |
| 192 | HIST1H2AC   | ENSG00000180573 | 8334      | 4733    | Z80778                | histone cluster 1, H2ac                                                     | 6p22.1        |
| 193 | ASIP        | ENSG00000101440 | 434       | 745     |                       | agouti signaling protein                                                    | 20q11.2-q12   |
| 194 | RRM2        | ENSG00000171848 | 6241      | 10452   |                       | ribonucleotide reductase M2                                                 | 2p25-p24      |
| 195 | HIST1H4C    | ENSG00000197061 | 8364      | 4787    | X60486                | histone cluster 1, H4c                                                      | 6p22.1        |
| 196 | CHEK1       | ENSG00000149554 | 1111      | 1925    | AF016582,<br>BC017575 | checkpoint kinase 1                                                         | 11q24.2       |
| 197 | CDC45       | ENSG00000093009 | 8318      | 1739    | AF053074              | cell division cycle 45                                                      | 22q11.21      |
| 198 | TFDP2       | ENSG00000114126 | 7029      | 11751   | U18422                | transcription factor Dp-2 (E2F dimerization partner 2)                      | 3q23          |
| 199 | ZBTB17      | ENSG00000116809 | 7709      | 12936   | U20647                | zinc finger and BTB domain containing 17                                    | 1p36.13       |

**Supplementary table S1. Cell cycle genes (continued)**

|     | <b>HGNC symbol</b> | <b>Ensembl ID</b> | <b>Entrez ID</b> | <b>HGNC.ID</b> | <b>Accession Numbers</b> | <b>Approved Name</b>                                                            | <b>Chr. location</b> |
|-----|--------------------|-------------------|------------------|----------------|--------------------------|---------------------------------------------------------------------------------|----------------------|
| 200 | BUB1               | ENSG00000169679   | 699              | 1148           | AF046078                 | BUB1 mitotic checkpoint serine/threonine kinase                                 | 2q13                 |
| 201 | BUB1B              | ENSG00000156970   | 701              | 1149           | AF107297                 | BUB1 mitotic checkpoint serine/threonine kinase B                               | 15q15                |
| 202 | BUB3               | ENSG00000154473   | 9184             | 1151           | AF053304                 | BUB3 mitotic checkpoint protein                                                 | 10q24                |
| 203 | CCNA2              | ENSG00000145386   | 890              | 1578           |                          | cyclin A2                                                                       | 4q27                 |
| 204 | CDC25B             | ENSG00000101224   | 994              | 1726           |                          | cell division cycle 25B                                                         | 20p13                |
| 205 | CDC25C             | ENSG00000158402   | 995              | 1727           | M34065                   | cell division cycle 25C                                                         | 5q31                 |
| 206 | CDK1               | ENSG00000170312   | 983              | 1722           | BC014563                 | cyclin-dependent kinase 1                                                       | 10q21.2              |
| 207 | CDKN2C             | ENSG00000123080   | 1031             | 1789           | BC000598                 | cyclin-dependent kinase inhibitor 2C (p18, inhibits CDK4)                       | 1p32.3               |
| 208 | ESPL1              | ENSG00000135476   | 9700             | 16856          | D79987                   | extra spindle pole bodies homolog 1 (S. cerevisiae)                             | 12q13.13             |
| 209 | FZR1               | ENSG00000105325   | 51343            | 24824          | AF083810                 | fizzy/cell division cycle 20 related 1 (Drosophila)                             | 19p13.3              |
| 210 | MAD2L1             | ENSG00000164109   | 4085             | 6763           | U65410                   | MAD2 mitotic arrest deficient-like 1 (yeast)                                    | 4q27                 |
| 211 | PLK1               | ENSG00000166851   | 5347             | 9077           |                          | polo-like kinase 1                                                              | 16p                  |
| 212 | TTK                | ENSG00000112742   | 7272             | 12401          |                          | TTK protein kinase                                                              | 6q14.1               |
| 213 | YWHAB              | ENSG00000166913   | 7529             | 12849          | X57346                   | tyrosine 3-monooxygenase/tryptophan 5-monooxygenase activation protein, beta    | 20q13.1              |
| 214 | YWHAE              | ENSG00000108953   | 7531             | 12851          | U54778                   | tyrosine 3-monooxygenase/tryptophan 5-monooxygenase activation protein, epsilon | 17p13.3              |
| 215 | YWHAG              | ENSG00000170027   | 7532             | 12852          | AF142498                 | tyrosine 3-monooxygenase/tryptophan 5-monooxygenase activation protein, gamma   | 7q11.23              |
| 216 | YWHAH              | ENSG00000128245   | 7533             | 12853          | X78138                   | tyrosine 3-monooxygenase/tryptophan 5-monooxygenase activation protein, eta     | 22q12.1-q13.1        |
| 217 | YWHAQ              | ENSG00000134308   | 10971            | 12854          | AF070556                 | tyrosine 3-monooxygenase/tryptophan 5-monooxygenase activation protein, theta   | 2p25.2-p25.1         |
| 218 | YWHAZ              | ENSG00000164924   | 7534             | 12855          | U28964                   | tyrosine 3-monooxygenase/tryptophan 5-monooxygenase activation protein, zeta    | 8q22.3               |
| 219 | MPEG1              | ENSG00000197629   | 219972           | 29619          | AK097211                 | macrophage expressed 1                                                          | 11q12.1              |
| 220 | SREK1              | ENSG00000153914   | 140890           | 17882          | AF459094                 | splicing regulatory glutamine/lysine-rich protein 1                             | 5q11.2-q12.1         |
| 221 | H1F0               | ENSG00000189060   | 3005             | 4714           | X03473                   | H1 histone family, member 0                                                     | 22q13.1              |
| 222 | ANKRD36C           | ENSG00000174501   | 400986           | 32946          | AL832836                 | ankyrin repeat domain 36C                                                       | 2q11.1               |
| 223 | INSIG2             | ENSG00000125629   | 51141            | 20452          | AF527632                 | insulin induced gene 2                                                          | 2q14.1               |
| 224 | YEATS4             | ENSG00000127337   | 8089             | 24859          | AJ245746                 | YEATS domain containing 4                                                       | 12q13-q15            |
| 225 | UBE2T              | ENSG00000077152   | 29089            | 25009          | AF161499                 | ubiquitin-conjugating enzyme E2T                                                | 1q32.1               |
| 226 | RAD51AP1           | ENSG00000111247   | 10635            | 16956          | AF006259                 | RAD51 associated protein 1                                                      | 12p13.2-p13.1        |
| 227 | CDCA5              | ENSG00000146670   | 113130           | 14626          | BG354578                 | cell division cycle associated 5                                                | 11q13.1              |
| 228 | FANCI              | ENSG00000140525   | 55215            | 25568          | BC004277                 | Fanconi anemia, complementation group I                                         | 15q26.1              |
| 229 | ZWINT              | ENSG00000122952   | 11130            | 13195          | AF067656                 | ZW10 interacting kinetochore protein                                            | 10q21-q22            |

**Supplementary table S1. Cell cycle genes (continued)**

|     | <b>HGNC symbol</b> | <b>Ensembl ID</b> | <b>Entrez ID</b> | <b>HGNC.ID</b> | <b>Accession Numbers</b>           | <b>Approved Name</b>                                             | <b>Chr. location</b> |
|-----|--------------------|-------------------|------------------|----------------|------------------------------------|------------------------------------------------------------------|----------------------|
| 230 | RHOBTB3            | ENSG00000164292   | 22836            | 18757          | AB020685                           | Rho-related BTB domain containing 3                              | 5q15                 |
| 231 | GOLGA8A            | ENSG00000175265   | 23015            | 31972          | BX648160                           | golgin A8 family, member A                                       | 15q14                |
| 232 | NFE2L2             | ENSG00000116044   | 4780             | 7782           |                                    | nuclear factor, erythroid 2-like 2                               | 2q31                 |
| 233 | ESCO2              | ENSG00000171320   | 157570           | 27230          | AF306679                           | establishment of sister chromatid cohesion N-acetyltransferase 2 | 8p21.1               |
| 234 | CDKL5              | ENSG00000008086   | 6792             | 11411          | Y15057                             | cyclin-dependent kinase-like 5                                   | Xp22                 |
| 235 | VPS25              | ENSG00000131475   | 84313            | 28122          | AB014763                           | vacuolar protein sorting 25 homolog (S. cerevisiae)              | 17q21.31             |
| 236 | POLQ               | ENSG00000051341   | 10721            | 9186           | AF052573                           | polymerase (DNA directed), theta                                 | 3q13.3               |
| 237 | H2AFX              | ENSG00000188486   | 3014             | 4739           | X14850                             | H2A histone family, member X                                     | 11q23.3              |
| 238 | MSH5               | ENSG00000204410   | 4439             | 7328           | AF070071                           | mutS homolog 5                                                   | 6p21.3               |
| 239 | KLF6               | ENSG00000067082   | 1316             | 2235           | U51869                             | Kruppel-like factor 6                                            | 10p15                |
| 240 | HRSP12             | ENSG00000132541   | 10247            | 16897          | BC008418                           | heat-responsive protein 12                                       | 8q22                 |
| 241 | DCTPP1             | ENSG00000179958   | 79077            | 28777          | BC001344                           | dCTP pyrophosphatase 1                                           | 16p11.2              |
| 242 | GCLM               | ENSG00000023909   | 2730             | 4312           | L35546                             | glutamate-cysteine ligase, modifier subunit                      | 1p21                 |
| 243 | HLA-DRA            | ENSG00000204287   | 3122             | 4947           |                                    | major histocompatibility complex, class II, DR alpha             | 6p21.3               |
| 244 | MND1               | ENSG00000121211   | 84057            | 24839          | AY028916                           | meiotic nuclear divisions 1 homolog (S. cerevisiae)              | 4q31.3               |
| 245 | PCBP1              | ENSG00000169564   | 5093             | 8647           |                                    | poly(rC) binding protein 1                                       | 2p13-p12             |
| 246 | STIL               | ENSG00000123473   | 6491             | 10879          | M74558                             | SCL/TAL1 interrupting locus                                      | 1p32                 |
| 247 | NEIL3              | ENSG00000109674   | 55247            | 24573          | AB079071                           | nei endonuclease VIII-like 3 (E. coli)                           | 4q34                 |
| 248 | FANCD2             | ENSG00000144554   | 2177             | 3585           | AF340183                           | Fanconi anemia, complementation group D2                         | 3p25.3               |
| 249 | SKA3               | ENSG00000165480   | 221150           | 20262          | AF361358                           | spindle and kinetochore associated complex subunit 3             | 13q11                |
| 250 | PNRC2              | ENSG00000189266   | 55629            | 23158          | AF151042                           | proline-rich nuclear receptor coactivator 2                      | 1p36.11              |
| 251 | TUBB               | ENSG00000196230   | 203068           | 20778          | AB062393                           | tubulin, beta class I                                            | 6p21.33              |
| 252 | TIMP1              | ENSG00000102265   | 7076             | 11820          |                                    | TIMP metalloproteinase inhibitor 1                               | Xp11.3-p11.23        |
| 253 | NDC80              | ENSG00000080986   | 10403            | 16909          | AF017790                           | NDC80 kinetochore complex component                              | 18p11.31             |
| 254 | CENPL              | ENSG00000120334   | 91687            | 17879          | BC033154,<br>BC019022,<br>AK055606 | centromere protein L                                             | 1q25.1               |
| 255 | IRAK1              | ENSG00000184216   | 3654             | 6112           | L76191                             | interleukin-1 receptor-associated kinase 1                       | Xq28                 |
| 256 | HJURP              | ENSG00000123485   | 55355            | 25444          |                                    | Holliday junction recognition protein                            | 2q37.1               |
| 257 | STK17B             | ENSG00000081320   | 9262             | 11396          | AB011421                           | serine/threonine kinase 17b                                      | 2q33.1               |
| 258 | STAT1              | ENSG00000115415   | 6772             | 11362          |                                    | signal transducer and activator of transcription 1, 91kDa        | 2q32.2-q32.3         |
| 259 | CDCA2              | ENSG00000184661   | 157313           | 14623          | BG354575                           | cell division cycle associated 2                                 | 8p21.2               |
| 260 | ARHGAP11A          | ENSG00000198826   | 9824             | 15783          | D87717                             | Rho GTPase activating protein 11A                                | 15q13.3              |



**Supplementary table S1. Cell cycle genes (continued)**

|     | <b>HGNC symbol</b> | <b>Ensembl ID</b> | <b>Entrez ID</b> | <b>HGNC.ID</b> | <b>Accession Numbers</b> | <b>Approved Name</b>                                                        | <b>Chr. location</b> |
|-----|--------------------|-------------------|------------------|----------------|--------------------------|-----------------------------------------------------------------------------|----------------------|
| 261 | KIFC1              | ENSG00000237649   | 3833             | 6389           | D14678                   | kinesin family member C1                                                    | 6p21.32              |
| 262 | CYP4V2             | ENSG00000145476   | 285440           | 23198          | AK022114                 | cytochrome P450, family 4, subfamily V, polypeptide 2                       | 4q35.2               |
| 263 | TUBB2A             | ENSG00000137267   | 7280             | 12412          | AY159127                 | tubulin, beta 2A class IIa                                                  | 6p25.2               |
| 264 | ARHGAP11B          | ENSG00000187951   | 89839            | 15782          | BC105788                 | Rho GTPase activating protein 11B                                           | 15q13.2              |
| 265 | CKAP2L             | ENSG00000169607   | 150468           | 26877          | AL832036                 | cytoskeleton associated protein 2-like                                      | 2q13                 |
| 266 | MEPCE              | ENSG00000146834   | 56257            | 20247          | AF264752                 | methylphosphate capping enzyme                                              | 7q22.1               |
| 267 | COQ6               | ENSG00000119723   | 51004            | 20233          | AF132944                 | coenzyme Q6 monooxygenase                                                   | 14q24.1              |
| 268 | TUBB4B             | ENSG00000188229   | 10383            | 20771          | BC019359                 | tubulin, beta 4B class IVb                                                  | 9q34.3               |
| 269 | WISP1              | ENSG00000104415   | 8840             | 12769          | AF100779                 | WNT1 inducible signaling pathway protein 1                                  | 8q24.22              |
| 270 | IL6                | ENSG00000136244   | 3569             | 6018           | M18403                   | interleukin 6                                                               | 7p21-p15             |
| 271 | WSB1               | ENSG00000109046   | 26118            | 19221          | AF069313                 | WD repeat and SOCS box containing 1                                         | 17q11.2              |
| 272 | HMGB2              | ENSG00000164104   | 3148             | 5000           |                          | high mobility group box 2                                                   | 4q31                 |
| 273 | MELK               | ENSG00000165304   | 9833             | 16870          | D79997                   | maternal embryonic leucine zipper kinase                                    | 9p13.1               |
| 274 | GAS1               | ENSG00000180447   | 2619             | 4165           |                          | growth arrest-specific 1                                                    | 9q21.3-q22           |
| 275 | AURKB              | ENSG00000178999   | 9212             | 11390          | AF004022                 | aurora kinase B                                                             | 17p13.1              |
| 276 | TUBA4A             | ENSG00000127824   | 7277             | 12407          | AK054731                 | tubulin, alpha 4a                                                           | 2q36.1               |
| 277 | RGS3               | ENSG00000138835   | 5998             | 9999           | AF006610                 | regulator of G-protein signaling 3                                          | 9q32                 |
| 278 | KIF11              | ENSG00000138160   | 3832             | 6388           | X85137                   | kinesin family member 11                                                    | 10q24.1              |
| 279 | SCYL1              | ENSG00000142186   | 57410            | 14372          | AF225424                 | SCY1-like 1 ( <i>S. cerevisiae</i> )                                        | 11q11-q12            |
| 280 | KIAA1524           | ENSG00000163507   | 57650            | 29302          | AB040957                 | KIAA1524                                                                    | 3q13.13              |
| 281 | NNMT               | ENSG00000166741   | 4837             | 7861           | U08021                   | nicotinamide N-methyltransferase                                            | 11q23.1              |
| 282 | LTBP3              | ENSG00000168056   | 4054             | 6716           | AF135960                 | latent transforming growth factor beta binding protein 3                    | 11q12                |
| 283 | MGAT2              | ENSG00000168282   | 4247             | 7045           | U15128                   | mannosyl (alpha-1,6-)-glycoprotein beta-1,2-N-acetylglucosaminyltransferase | 14q21                |
| 284 | CASP3              | ENSG00000164305   | 836              | 1504           | BC016926                 | caspace 3, apoptosis-related cysteine peptidase                             | 4q34                 |
| 285 | HP1BP3             | ENSG00000127483   | 50809            | 24973          | BC053327                 | heterochromatin protein 1, binding protein 3                                | 1p36.12              |
| 286 | TUBA3D             | ENSG00000075886   | 113457           | 24071          | K03460                   | tubulin, alpha 3d                                                           | 2q21.1               |
| 287 | UBE2C              | ENSG00000175063   | 11065            | 15937          | U73379                   | ubiquitin-conjugating enzyme E2C                                            | 20q13.12             |
| 288 | ARL4A              | ENSG00000122644   | 10124            | 695            | U73960                   | ADP-ribosylation factor-like 4A                                             | 7p21.3               |
| 289 | IQGAP3             | ENSG00000183856   | 128239           | 20669          | AY253300                 | IQ motif containing GTPase activating protein 3                             | 1q21.3               |
| 290 | FAM72A             | ENSG00000196550   | 729533           | 24044          | CR407567                 | family with sequence similarity 72, member A                                | 1q32.1               |
| 291 | FAM72B             | ENSG00000188610   | 653820           | 24805          | AL357493                 | family with sequence similarity 72, member B                                | 1p12                 |
| 292 | PSRC1              | ENSG00000134222   | 84722            | 24472          |                          | proline/serine-rich coiled-coil 1                                           | 1p13.3               |
| 293 | TOP2A              | ENSG00000131747   | 7153             | 11989          |                          | topoisomerase (DNA) II alpha 170kDa                                         | 17q21-q22            |

**Supplementary table S1. Cell cycle genes (continued)**

|     | <b>HGNC symbol</b> | <b>Ensembl ID</b> | <b>Entrez ID</b> | <b>HGNC.ID</b> | <b>Accession Numbers</b> | <b>Approved Name</b>                                    | <b>Chr. location</b> |
|-----|--------------------|-------------------|------------------|----------------|--------------------------|---------------------------------------------------------|----------------------|
| 294 | RHNO1              | ENSG00000171792   | 83695            | 28206          | AK021945                 | RAD9-HUS1-RAD1 interacting nuclear orphan 1             | 12p13.33             |
| 295 | FAM83D             | ENSG00000101447   | 81610            | 16122          | AL023803                 | family with sequence similarity 83, member D            | 20q11.23             |
| 296 | NCAPH              | ENSG00000121152   | 23397            | 1112           | BC024211                 | non-SMC condensin I complex, subunit H                  | 2q11.2               |
| 297 | KIF23              | ENSG00000137807   | 9493             | 6392           | X67155                   | kinesin family member 23                                | 15q23                |
| 298 | ZC3H3              | ENSG00000014164   | 23144            | 28972          | D63484                   | zinc finger CCCH-type containing 3                      | 8q24.3               |
| 299 | TUBA1A             | ENSG00000167552   | 7846             | 20766          | AF141347                 | tubulin, alpha 1a                                       | 12q13.12             |
| 300 | MIS18BP1           | ENSG00000129534   | 55320            | 20190          | AB067490                 | MIS18 binding protein 1                                 | 14q21.1              |
| 301 | CDCA8              | ENSG00000134690   | 55143            | 14629          | BG354581                 | cell division cycle associated 8                        | 1p34.3               |
| 302 | TUBD1              | ENSG00000108423   | 51174            | 16811          | AF201333                 | tubulin, delta 1                                        | 17q23.1              |
| 303 | DNMT3B             | ENSG00000088305   | 1789             | 2979           |                          | DNA (cytosine-5-)-methyltransferase 3 beta              | 20q11.2              |
| 304 | CCNF               | ENSG00000162063   | 899              | 1591           | Z36714                   | cyclin F                                                | 16p13.3              |
| 305 | NLRP2              | ENSG00000022556   | 55655            | 22948          | AK000517                 | NLR family, pyrin domain containing 2                   | 19q13.42             |
| 306 | SUCLG2             | ENSG00000172340   | 8801             | 11450          | AF058954                 | succinate-CoA ligase, GDP-forming, beta subunit         | 3p14.3               |
| 307 | BRD8               | ENSG00000112983   | 10902            | 19874          | AF016270                 | bromodomain containing 8                                | 5q31                 |
| 308 | BIRC3              | ENSG00000023445   | 330              | 591            | L49432                   | baculoviral IAP repeat containing 3                     | 11q22                |
| 309 | STAT5B             | ENSG00000173757   | 6777             | 11367          | BC065227                 | signal transducer and activator of transcription 5B     | 17q11.2              |
| 310 | KLF9               | ENSG00000119138   | 687              | 1123           | BC069431                 | Kruppel-like factor 9                                   | 9q21.11              |
| 311 | TRIP13             | ENSG00000071539   | 9319             | 12307          | L40384                   | thyroid hormone receptor interactor 13                  | 5p15                 |
| 312 | HSPA2              | ENSG00000126803   | 3306             | 5235           | L26336, BC001752         | heat shock 70kDa protein 2                              | 14q23                |
| 313 | PIF1               | ENSG00000140451   | 80119            | 26220          | AK026345                 | PIF1 5'-to-3' DNA helicase                              | 15q22.1              |
| 314 | SAP30              | ENSG00000164105   | 8819             | 10532          | AF055993                 | Sin3A-associated protein, 30kDa                         | 4q34.1               |
| 315 | ARHGEF39           | ENSG00000137135   | 84904            | 25909          | AK001187                 | Rho guanine nucleotide exchange factor (GEF) 39         | 9p13.3               |
| 316 | CCDC107            | ENSG00000159884   | 203260           | 28465          | AK075523                 | coiled-coil domain containing 107                       | 9q13.3               |
| 317 | NUSAP1             | ENSG00000137804   | 51203            | 18538          | AF290612                 | nucleolar and spindle associated protein 1              | 15q14                |
| 318 | CCNB1              | ENSG00000134057   | 891              | 1579           | U22364                   | cyclin B1                                               | 5q12                 |
| 319 | CCNB2              | ENSG00000157456   | 9133             | 1580           | AF002822                 | cyclin B2                                               | 15q21.3              |
| 320 | CCNB3              | ENSG00000147082   | 85417            | 18709          | AJ314764                 | cyclin B3                                               | Xp11                 |
| 321 | MAD1L1             | ENSG00000002822   | 8379             | 6762           | U33822                   | MAD1 mitotic arrest deficient-like 1 (yeast)            | 7p22                 |
| 322 | MAD2L2             | ENSG00000116670   | 10459            | 6764           | AF139365                 | MAD2 mitotic arrest deficient-like 2 (yeast)            | 1p36                 |
| 323 | GABPB1             | ENSG00000104064   | 2553             | 4074           | D13316                   | GA binding protein transcription factor, beta subunit 1 | 15q21.2              |
| 324 | SHCBP1             | ENSG00000171241   | 79801            | 29547          | AK055931                 | SHC SH2-domain binding protein 1                        | 16q11                |
| 325 | CKS1B              | ENSG00000173207   | 1163             | 19083          | BC007751                 | CDC28 protein kinase regulatory subunit 1B              | 1q21.2               |
| 326 | BTNL9              | ENSG00000165810   | 153579           | 24176          | AK057097                 | butyrophilin-like 9                                     | 5q35.3               |
| 327 | KPNA2              | ENSG00000182481   | 3838             | 6395           | U09559                   | karyopherin alpha 2 (RAG cohort 1, importin alpha 1)    | 17q24.2              |

**Supplementary table S1. Cell cycle genes (continued)**

|     | <b>HGNC symbol</b> | <b>Ensembl ID</b> | <b>Entrez ID</b> | <b>HGNC.ID</b> | <b>Accession Numbers</b> | <b>Approved Name</b>                                          | <b>Chr. location</b> |
|-----|--------------------|-------------------|------------------|----------------|--------------------------|---------------------------------------------------------------|----------------------|
| 328 | SMC4               | ENSG00000113810   | 10051            | 14013          | AF092564                 | structural maintenance of chromosomes 4                       | 3q26.1               |
| 329 | SGOL2              | ENSG00000163535   | 151246           | 30812          | AY094614                 | shugoshin-like 2 (S. pombe)                                   | 2q33.2               |
| 330 | MKI67              | ENSG00000148773   | 4288             | 7107           | X65550                   | marker of proliferation Ki-67                                 | 10q26.2              |
| 331 | PPP1R10            | ENSG00000204569   | 5514             | 9284           | Y13247                   | protein phosphatase 1, regulatory subunit 10                  | 6p21.3               |
| 332 | CKAP2              | ENSG00000136108   | 26586            | 1990           | AF177227                 | cytoskeleton associated protein 2                             | 13q14                |
| 333 | CNTROB             | ENSG00000170037   | 116840           | 29616          | AF331638                 | centrobin, centrosomal BRCA2 interacting protein              | 17p13.1              |
| 334 | TTC38              | ENSG00000075234   | 55020            | 26082          |                          | tetratricopeptide repeat domain 38                            | 22q13                |
| 335 | CDCA3              | ENSG00000111665   | 83461            | 14624          | BG354576                 | cell division cycle associated 3                              | 12p13.31             |
| 336 | RCAN1              | ENSG00000159200   | 1827             | 3040           |                          | regulator of calcineurin 1                                    | 21q22.1-q22.2        |
| 337 | CENPA              | ENSG00000115163   | 1058             | 1851           | U14518                   | centromere protein A                                          | 2p23.3               |
| 338 | FOXM1              | ENSG00000111206   | 2305             | 3818           | Y12773                   | forkhead box M1                                               | 12p13                |
| 339 | ATL2               | ENSG00000119787   | 64225            | 24047          |                          | atlastin GTPase 2                                             | 2p22.3               |
| 340 | BORA               | ENSG00000136122   | 79866            | 24724          | BC025367                 | bora, aurora kinase A activator                               | 13q22.1              |
| 341 | HINT3              | ENSG00000111911   | 135114           | 18468          | AK057688                 | histidine triad nucleotide binding protein 3                  | 6q22.33              |
| 342 | SPDL1              | ENSG00000040275   | 54908            | 26010          | BC012568                 | spindle apparatus coiled-coil protein 1                       | 5q35.1               |
| 343 | GAS2L3             | ENSG00000139354   | 283431           | 27475          | AK095594                 | growth arrest-specific 2 like 3                               | 12q23.1              |
| 344 | EIF5A2             | ENSG00000163577   | 56648            | 3301           | AF293386                 | eukaryotic translation initiation factor 5A2                  | 3q26.2               |
| 345 | CTNNA1             | ENSG00000044115   | 1495             | 2509           | D13866                   | catenin (cadherin-associated protein), alpha 1, 102kDa        | 5q31.2               |
| 346 | TACC3              | ENSG00000013810   | 10460            | 11524          | AF093543                 | transforming, acidic coiled-coil containing protein 3         | 4p16.3               |
| 347 | SGCD               | ENSG00000170624   | 6444             | 10807          | BX537948                 | sarcoglycan, delta (35kDa dystrophin-associated glycoprotein) | 5q33-q34             |
| 348 | HN1                | ENSG00000189159   | 51155            | 14569          | AF086910                 | hematological and neurological expressed 1                    | 17q25.1              |
| 349 | RANGAP1            | ENSG00000100401   | 5905             | 9854           | X82260                   | Ran GTPase activating protein 1                               | 22q13                |
| 350 | KIF14              | ENSG00000118193   | 9928             | 19181          | D26361                   | kinesin family member 14                                      | 1q32.1               |
| 351 | RRP1               | ENSG00000160214   | 8568             | 18785          | U79775                   | ribosomal RNA processing 1                                    | 21q22.3              |
| 352 | KIF20B             | ENSG00000138182   | 9585             | 7212           | L16782                   | kinesin family member 20B                                     | 10q23.31             |
| 353 | PBK                | ENSG00000168078   | 55872            | 18282          | AB027249                 | PDZ binding kinase                                            | 8p21.2               |
| 354 | SRSF3              | ENSG00000112081   | 6428             | 10785          | L10838                   | serine/arginine-rich splicing factor 3                        | 6p21                 |
| 355 | ASXL1              | ENSG00000171456   | 171023           | 18318          | AJ438952                 | additional sex combs like transcriptional regulator 1         | 20q11                |
| 356 | BMP2               | ENSG00000125845   | 650              | 1069           |                          | bone morphogenetic protein 2                                  | 20p12                |
| 357 | CIT                | ENSG00000122966   | 11113            | 1985           | AB023166                 | citron rho-interacting serine/threonine kinase                | 12q24.23             |
| 358 | CCNA1              | ENSG00000133101   | 8900             | 1577           | U66838                   | cyclin A1                                                     | 13q12.3-q13          |
| 359 | CHEK2              | ENSG00000183765   | 11200            | 16627          | AF086904                 | checkpoint kinase 2                                           | 22q12.1              |
| 360 | WEE1               | ENSG00000166483   | 7465             | 12761          | X62048                   | WEE1 G2 checkpoint kinase                                     | 11p15.4              |
| 361 | CDC23              | ENSG00000094880   | 8697             | 1724           | AF053977                 | cell division cycle 23                                        | 5q31                 |

**Supplementary table S1. Cell cycle genes (continued)**

|     | <b>HGNC symbol</b> | <b>Ensembl ID</b> | <b>Entrez ID</b> | <b>HGNC.ID</b> | <b>Accession Numbers</b> | <b>Approved Name</b>                               | <b>Chr. location</b> |
|-----|--------------------|-------------------|------------------|----------------|--------------------------|----------------------------------------------------|----------------------|
| 362 | CDK7               | ENSG00000134058   | 1022             | 1778           |                          | cyclin-dependent kinase 7                          | 5q12.1               |
| 363 | GADD45B            | ENSG00000099860   | 4616             | 4096           | AF090950                 | growth arrest and DNA-damage-inducible, beta       | 19p13.3              |
| 364 | GADD45G            | ENSG00000130222   | 10912            | 4097           | D83023                   | growth arrest and DNA-damage-inducible, gamma      | 9q22.1-q22.2         |
| 365 | SFN                | ENSG00000175793   | 2810             | 10773          | BC023552                 | stratifin                                          | 1p36.11              |
| 366 | SMC3               | ENSG00000108055   | 9126             | 2468           | AF020043                 | structural maintenance of chromosomes 3            | 10q25                |
| 367 | WEE2               | ENSG00000214102   | 494551           | 19684          | AK131218                 | WEE1 homolog 2 (S. pombe)                          | 7q32                 |
| 368 | CDC14A             | ENSG00000079335   | 8556             | 1718           | AF000367                 | cell division cycle 14A                            | 1p21                 |
| 369 | CDC14B             | ENSG00000081377   | 8555             | 1719           | AF023158                 | cell division cycle 14B                            | 9q22.3               |
| 370 | CDC20              | ENSG00000117399   | 991              | 1723           | U05340                   | cell division cycle 20                             | 1p34.1               |
| 371 | CDC27              | ENSG00000004897   | 996              | 1728           | U00001                   | cell division cycle 27                             | 17q21.32             |
| 372 | MCM4               | ENSG00000104738   | 4173             | 6947           |                          | minichromosome maintenance complex component 4     | 8q12-q13             |
| 373 | PTTG2              | ENSG00000250254   | 10744            | 9691           | AF095288                 | pituitary tumor-transforming 2                     | 4p14                 |
| 374 | RAD21              | ENSG00000164754   | 5885             | 9811           | BC050381                 | RAD21 homolog (S. pombe)                           | 8q24.11              |
| 375 | STAG1              | ENSG00000118007   | 10274            | 11354          | Z75330                   | stromal antigen 1                                  | 3q22.2-q22.3         |
| 376 | CDH1               | ENSG00000039068   | 999              | 1748           | L08599                   | cadherin 1, type 1, E-cadherin (epithelial)        | 16q22.1              |
| 377 | MEN1               | ENSG00000133895   | 4221             | 7010           | U93236                   | multiple endocrine neoplasia I                     | 11q13                |
| 378 | TBC1D8             | ENSG00000204634   | 11138            | 17791          | AB024057                 | TBC1 domain family, member 8 (with GRAM domain)    | 2q12.1               |
| 379 | DNAJB1             | ENSG00000132002   | 3337             | 5270           | D49547                   | DnaJ (Hsp40) homolog, subfamily B, member 1        | 19p13.12             |
| 380 | AKIRIN2            | ENSG00000135334   | 55122            | 21407          | BC000764                 | akirin 2                                           | 6q15                 |
| 381 | ANLN               | ENSG00000011426   | 54443            | 14082          | AF273437                 | anillin, actin binding protein                     | 7p15-p14             |
| 382 | NUP35              | ENSG00000163002   | 129401           | 29797          | AF514993                 | nucleoporin 35kDa                                  | 2q32                 |
| 383 | NDE1               | ENSG00000072864   | 54820            | 17619          | AF124431                 | nudE neurodevelopment protein 1                    | 16p13.11             |
| 384 | KIF2C              | ENSG00000142945   | 11004            | 6393           | U63743                   | kinesin family member 2C                           | 1p34.1               |
| 385 | GTSE1              | ENSG00000075218   | 51512            | 13698          | AF223408                 | G-2 and S-phase expressed 1                        | 22q13.2-q13.3        |
| 386 | G2E3               | ENSG00000092140   | 55632            | 20338          | AK000340                 | G2/M-phase specific E3 ubiquitin protein ligase    | 14q12                |
| 387 | AURKA              | ENSG00000087586   | 6790             | 11393          | BC001280                 | aurora kinase A                                    | 20q13                |
| 388 | DEPDC1B            | ENSG00000035499   | 55789            | 24902          | AF303178                 | DEP domain containing 1B                           | 5q12                 |
| 389 | ADH4               | ENSG00000198099   | 127              | 252            | M15943                   | alcohol dehydrogenase 4 (class II), pi polypeptide | 4q22                 |
| 390 | NUF2               | ENSG00000143228   | 83540            | 14621          | BG354574                 | NUF2, NDC80 kinetochore complex component          | 1q23.3               |
| 391 | SPAG5              | ENSG00000076382   | 10615            | 13452          | AF063308                 | sperm associated antigen 5                         | 17q11.2              |
| 392 | CENPF              | ENSG00000117724   | 1063             | 1857           | U30872                   | centromere protein F, 350/400kDa                   | 1q41                 |
| 393 | LMNA               | ENSG00000160789   | 4000             | 6636           | BC014507                 | lamin A/C                                          | 1q22                 |
| 394 | CEP55              | ENSG00000138180   | 55165            | 1161           | AK001402                 | centrosomal protein 55kDa                          | 10q24.1              |
| 395 | HMMR               | ENSG00000072571   | 3161             | 5012           | U29343                   | hyaluronan-mediated motility receptor (RHAMM)      | 5q34                 |

**Supplementary table S1. Cell cycle genes (continued)**

| HGNC symbol | Ensembl ID | Entrez ID       | HGNC.ID | Accession Numbers | Approved Name | Chr. location                                                                                        |              |
|-------------|------------|-----------------|---------|-------------------|---------------|------------------------------------------------------------------------------------------------------|--------------|
| 396         | DEPDC1     | ENSG00000024526 | 55635   | 22949             | AK000361      | DEP domain containing 1                                                                              | 1p31.2       |
| 397         | IDO1       | ENSG00000131203 | 3620    | 6059              | M34455        | indoleamine 2,3-dioxygenase 1                                                                        | 8p12-p11     |
| 398         | BIRC2      | ENSG00000110330 | 329     | 590               | L49431        | baculoviral IAP repeat containing 2                                                                  | 11q22        |
| 399         | PSMG3      | ENSG00000157778 | 84262   | 22420             | BC027171      | proteasome (prosome, macropain) assembly chaperone 3                                                 | 7p22.3       |
| 400         | CENPE      | ENSG00000138778 | 1062    | 1856              | Z15005        | centromere protein E, 312kDa                                                                         | 4q24-q25     |
| 401         | AHI1       | ENSG00000135541 | 54806   | 21575             | AJ459824      | Abelson helper integration site 1                                                                    | 6q23.2       |
| 402         | TPX2       | ENSG00000088325 | 22974   | 1249              | AF098158      | TPX2, microtubule-associated                                                                         | 20q11.2      |
| 403         | IL7R       | ENSG00000168685 | 3575    | 6024              | M29696        | interleukin 7 receptor                                                                               | 5p13         |
| 404         | ARL6IP1    | ENSG00000170540 | 23204   | 697               | BC010281      | ADP-ribosylation factor-like 6 interacting protein 1                                                 | 16p12-p11.2  |
| 405         | RAD51C     | ENSG00000108384 | 5889    | 9820              | AF029670      | RAD51 paralog C                                                                                      | 17q25.1      |
| 406         | ZC3HC1     | ENSG00000091732 | 51530   | 29913             | AF151050      | zinc finger, C3HC-type containing 1                                                                  | 7q32.2       |
| 407         | FAM102B    | ENSG00000162636 | 284611  | 27637             | CR749397      | family with sequence similarity 102, member B                                                        | 1p13.3       |
| 408         | HMGB3      | ENSG00000029993 | 3149    | 5004              | AF274572      | high mobility group box 3                                                                            | Xq28         |
| 409         | MZT1       | ENSG00000204899 | 440145  | 33830             |               | mitotic spindle organizing protein 1                                                                 | 13q22.1      |
| 410         | RAN        | ENSG00000132341 | 5901    | 9846              | M31469        | RAN, member RAS oncogene family                                                                      | 12q24.33     |
| 411         | CKAP5      | ENSG00000175216 | 9793    | 28959             |               | cytoskeleton associated protein 5                                                                    | 11p11.2      |
| 412         | FAM64A     | ENSG00000129195 | 54478   | 25483             |               | family with sequence similarity 64, member A                                                         | 17p13.2      |
| 413         | SRD5A1     | ENSG00000145545 | 6715    | 11284             | M32313        | steroid-5-alpha-reductase, alpha polypeptide 1 (3-oxo-5 alpha-steroid delta 4-dehydrogenase alpha 1) | 5p15.31      |
| 414         | PLEKHG4B   | ENSG00000153404 | 153478  | 29399             | BC008352      | pleckstrin homology domain containing, family G (with RhoGef domain) member 4B                       | 5p15.33      |
| 415         | HMG20B     | ENSG00000064961 | 10362   | 5002              | BC003505      | high mobility group 20B                                                                              | 19p13.3      |
| 416         | LRRC17     | ENSG00000128606 | 10234   | 16895             | U32907        | leucine rich repeat containing 17                                                                    | 7q22.1       |
| 417         | SMTN       | ENSG00000183963 | 6525    | 11126             | AY061972      | smoothelin                                                                                           | 22q12        |
| 418         | ZNF521     | ENSG00000198795 | 25925   | 24605             | AK027354      | zinc finger protein 521                                                                              | 18q11.2      |
| 419         | CKS2       | ENSG00000123975 | 1164    | 2000              | X54942        | CDC28 protein kinase regulatory subunit 2                                                            | 9q22         |
| 420         | MAPK13     | ENSG00000156711 | 5603    | 6875              | Y10488        | mitogen-activated protein kinase 13                                                                  | 6p21         |
| 421         | ECT2       | ENSG00000114346 | 1894    | 3155              | AA206473      | epithelial cell transforming 2                                                                       | 3q26.1-q26.2 |
| 422         | ERN2       | ENSG00000134398 | 10595   | 16942             | AA527544      | endoplasmic reticulum to nucleus signaling 2                                                         | 16p12.2      |
| 423         | GPSM2      | ENSG00000121957 | 29899   | 29501             | AY136740      | G-protein signaling modulator 2                                                                      | 1p13.3       |
| 424         | KIF5B      | ENSG00000170759 | 3799    | 6324              | X65873        | kinesin family member 5B                                                                             | 10p11.22     |
| 425         | SEPN1      | ENSG00000162430 | 57190   | 15999             | AF166125      | selenoprotein N, 1                                                                                   | 1p36.13      |
| 426         | NEK2       | ENSG00000117650 | 4751    | 7745              | U11050        | NIMA-related kinase 2                                                                                | 1q32.3       |
| 427         | HSPA1L     | ENSG00000204390 | 3305    | 5234              | D85730        | heat shock 70kDa protein 1-like                                                                      | 6p21.3       |
| 428         | FAM216A    | ENSG00000204856 | 29902   | 30180             | U79274        | family with sequence similarity 216, member A                                                        | 12q24.11     |

**Supplementary table S1. Cell cycle genes (continued)**

|     | <b>HGNC symbol</b> | <b>Ensembl ID</b> | <b>Entrez ID</b> | <b>HGNC.ID</b> | <b>Accession Numbers</b> | <b>Approved Name</b>                                      | <b>Chr. location</b> |
|-----|--------------------|-------------------|------------------|----------------|--------------------------|-----------------------------------------------------------|----------------------|
| 429 | INPP5K             | ENSG00000132376   | 51763            | 33882          |                          | inositol polyphosphate-5-phosphatase K                    | 17p13.3              |
| 430 | GCSAM              | ENSG00000174500   | 257144           | 20253          | BC030506                 | germinal center-associated, signaling and motility        | 3q13.13              |
| 431 | DLGAP5             | ENSG00000126787   | 9787             | 16864          | D13633                   | discs, large (Drosophila) homolog-associated protein 5    | 14q22.3              |
| 432 | CEP70              | ENSG00000114107   | 80321            | 29972          | AF202146                 | centrosomal protein 70kDa                                 | 3q22.3               |
| 433 | LBR                | ENSG00000143815   | 3930             | 6518           | L25931                   | lamin B receptor                                          | 1q42.1               |
| 434 | BIRC5              | ENSG00000089685   | 332              | 593            | U75285                   | baculoviral IAP repeat containing 5                       | 17q25.3              |
| 435 | KBTBD2             | ENSG00000170852   | 25948            | 21751          | AB040922                 | kelch repeat and BTB (POZ) domain containing 2            | 7p14.3               |
| 436 | OLR1               | ENSG00000173391   | 4973             | 8133           | D89050                   | oxidized low density lipoprotein (lectin-like) receptor 1 | 12p13.1-p12.3        |
| 437 | HBG2               | ENSG00000196565   | 3048             | 4832           | BC029387                 | hemoglobin, gamma G                                       | 11p15.5              |
| 438 | SLC17A2            | ENSG00000112337   | 10246            | 10930          | U90544                   | solute carrier family 17, member 2                        | 6p22.2               |
| 439 | PWP1               | ENSG00000136045   | 11137            | 17015          | BC000067                 | PWP1 homolog (S. cerevisiae)                              | 12q23.3              |
| 440 | BTBD3              | ENSG00000132640   | 22903            | 15854          | AB023169                 | BTB (POZ) domain containing 3                             | 20p12.2              |
| 441 | USB1               | ENSG00000103005   | 79650            | 25792          | AK023216                 | U6 snRNA biogenesis 1                                     | 16q13                |
| 442 | FOPNL              | ENSG00000133393   | 123811           | 26435          | AL832498                 | FGFR1OP N-terminal like                                   | 16p13.11             |
| 443 | SFPQ               | ENSG00000116560   | 6421             | 10774          | X70944                   | splicing factor proline/glutamine-rich                    | 1p34.3               |
| 444 | PRC1               | ENSG00000198901   | 9055             | 9341           | AF044588                 | protein regulator of cytokinesis 1                        | 15q26.1              |
| 445 | KNSTRN             | ENSG00000128944   | 90417            | 30767          | AK027408                 | kinetochore-localized astrin/SPAG5 binding protein        | 15q15.1              |
| 446 | UBE2S              | ENSG00000108106   | 27338            | 17895          | BC004236                 | ubiquitin-conjugating enzyme E2S                          | 19q13.43             |
| 447 | PCF11              | ENSG00000165494   | 51585            | 30097          | AB020631                 | PCF11 cleavage and polyadenylation factor subunit         | 11q13                |
| 448 | PLAG1              | ENSG00000181690   | 5324             | 9045           | U65002                   | pleiomorphic adenoma gene 1                               | 8q12                 |
| 449 | SAPCD2             | ENSG00000186193   | 89958            | 28055          | BC024299                 | suppressor APC domain containing 2                        | 9q34.3               |
| 450 | XPO4               | ENSG00000132953   | 64328            | 17796          | AB051508                 | exportin 4                                                | 13q11                |
| 451 | PRR11              | ENSG00000068489   | 55771            | 25619          |                          | proline rich 11                                           | 17q23.2              |
| 452 | VANGL1             | ENSG00000173218   | 81839            | 15512          | AB075805                 | VANGL planar cell polarity protein 1                      | 1p13.1               |
| 453 | ZPBP               | ENSG00000042813   | 11055            | 15662          | D17570                   | zona pellucida binding protein                            | 7p14.3               |
| 454 | TROAP              | ENSG00000135451   | 10024            | 12327          | U04810                   | trophinin associated protein                              | 12q13.12             |
| 455 | GAS6               | ENSG00000183087   | 2621             | 4168           |                          | growth arrest-specific 6                                  | 13q34                |
| 456 | LRIF1              | ENSG00000121931   | 55791            | 30299          | AY190122                 | ligand dependent nuclear receptor interacting factor 1    | 1p13.3               |
| 457 | ANAPC5             | ENSG00000089053   | 51433            | 15713          | AF191339                 | anaphase promoting complex subunit 5                      | 12q24.31             |
| 458 | CDC16              | ENSG00000130177   | 8881             | 1720           | U18291                   | cell division cycle 16                                    | 13q34                |
| 459 | CDKN1C             | ENSG00000129757   | 1028             | 1786           | D64137                   | cyclin-dependent kinase inhibitor 1C (p57, Kip2)          | 11p15.5              |
| 460 | CDKN2B             | ENSG00000147883   | 1030             | 1788           | AB060808                 | cyclin-dependent kinase inhibitor 2B (p15, inhibits CDK4) | 9p21                 |
| 461 | SMC1A              | ENSG00000072501   | 8243             | 11111          | S78271                   | structural maintenance of chromosomes 1A                  | Xp11.22-<br>p11.21   |

**Supplementary table S1. Cell cycle genes (continued)**

|     | <b>HGNC symbol</b> | <b>Ensembl ID</b> | <b>Entrez ID</b> | <b>HGNC.ID</b> | <b>Accession Numbers</b> | <b>Approved Name</b>                     | <b>Chr. location</b> |
|-----|--------------------|-------------------|------------------|----------------|--------------------------|------------------------------------------|----------------------|
| 462 | SMC1B              | ENSG00000077935   | 27127            | 11112          | AJ504806                 | structural maintenance of chromosomes 1B | 22q13                |
| 463 | STAG2              | ENSG00000101972   | 10735            | 11355          | Z75331                   | stromal antigen 2                        | Xq25                 |

**Supplementary table S2.**

**Cross-table of concordance between Ki67 immunohistochemical staining and gene expression signature classifications in Cohorts 1 and 2**

| Characteristics                   |               | Number of patients grouped by Ki67 status in Cohorts 1 and 2 |                      |          |         |                      |                     |          |         |
|-----------------------------------|---------------|--------------------------------------------------------------|----------------------|----------|---------|----------------------|---------------------|----------|---------|
|                                   |               | Cohort 1 (n=379)                                             |                      |          |         | Cohort 2 (n=209)     |                     |          |         |
|                                   |               | Ki67 < 16<br>(n=184)                                         | Ki67 ≥ 16<br>(n=195) | nC       | nD      | Ki67 < 16<br>(n=140) | Ki67 ≥ 16<br>(n=69) | nC       | nD      |
|                                   |               | n (%)                                                        | n (%)                | n (%)    | n (%)   | n (%)                | n (%)               | n (%)    |         |
| <b>Gene expression signatures</b> |               |                                                              |                      |          |         |                      |                     |          |         |
| GGI                               |               |                                                              |                      |          |         |                      |                     |          |         |
|                                   | Grade 1       | 120 (65)                                                     | 14 (7)               |          |         | 119 (85)             | 20 (29)             |          |         |
|                                   | Grade 3       | 64 (35)                                                      | 181 (93)             | 301 (79) | 78 (21) | 21 (15)              | 49 (71)             | 168 (80) | 41 (20) |
| 70-Gene                           |               |                                                              |                      |          |         |                      |                     |          |         |
|                                   | Good          | 142 (77)                                                     | 32 (16)              | 305 (80) | 74 (19) | 102 (73)             | 8 (12)              | 163 (78) | 46 (22) |
|                                   | Poor          | 42 (23)                                                      | 163 (84)             |          |         | 38 (27)              | 61 (88)             |          |         |
| Recurrence score                  |               |                                                              |                      |          |         |                      |                     |          |         |
|                                   | Low           | 71 (39)                                                      | 5 (3)                |          |         | 70 (50)              | 8 (12)              |          |         |
|                                   | Intermediate  | 35 (19)                                                      | 10 (5)               | 296 (78) | 83 (22) | 35 (25)              | 5 (7)               | 166 (79) | 43 (21) |
|                                   | High          | 78 (42)                                                      | 180 (92)             |          |         | 35 (25)              | 56 (81)             |          |         |
| Cell Cycle score                  |               |                                                              |                      |          |         |                      |                     |          |         |
|                                   | Low           | 70 (38)                                                      | 3 (1)                |          |         | 103 (74)             | 11 (16)             |          |         |
|                                   | Intermediate  | 64 (35)                                                      | 16 (8)               | 326 (86) | 53 (14) | 26 (19)              | 22 (32)             | 187 (89) | 22 (11) |
|                                   | High          | 50 (27)                                                      | 176 (91)             |          |         | 11 (8)               | 36 (52)             |          |         |
| PAM50                             |               |                                                              |                      |          |         |                      |                     |          |         |
|                                   | Luminal A     | 111 (60)                                                     | 15 (7)               |          |         | 54 (39)              | 3 (4)               |          |         |
|                                   | Luminal B     | 24 (13)                                                      | 54 (28)              |          |         | 27 (19)              | 18 (27)             |          |         |
|                                   | HER2-enriched | 12 (6)                                                       | 41 (21)              | 307 (81) | 72 (19) | 18 (13)              | 30 (43)             | 150 (72) | 59 (28) |
|                                   | Basal-Like    | 14 (8)                                                       | 78 (40)              |          |         | 8 (6)                | 15 (22)             |          |         |
|                                   | Normal-Like   | 23 (12)                                                      | 7 (4)                |          |         | 33 (24)              | 3 (4)               |          |         |

GGI = Genomic grade index, nC = Number of concordant cases, nD = Number of discordant cases  
 Numbers in red = Cases in which Ki67 and gene expression signatures are not in agreement.



**Supplementary table S3.****Clinico-pathological characteristics of patient subgroups in cohort 1**

| Variables           | All (n=379) |    | ER+/LN-(n=104) |     | ER+/LN+(n=167) |     | ER-(n=103) |     |
|---------------------|-------------|----|----------------|-----|----------------|-----|------------|-----|
|                     | #           | %  | #              | %   | #              | %   | #          | %   |
| ER                  |             |    |                |     |                |     |            |     |
| Positive            | 276         | 73 | 104            | 100 | 167            | 100 | 0          | 0   |
| Negative            | 103         | 27 | 0              | 0   | 0              | 0   | 103        | 100 |
| PR                  |             |    |                |     |                |     |            |     |
| Positive            | 233         | 61 | 90             | 87  | 134            | 80  | 4          | 4   |
| Negative            | 146         | 39 | 14             | 13  | 33             | 20  | 99         | 96  |
| HER2                |             |    |                |     |                |     |            |     |
| Positive            | 79          | 21 | 10             | 10  | 32             | 19  | 37         | 36  |
| Negative            | 300         | 79 | 94             | 90  | 135            | 81  | 66         | 64  |
| Elston-Ellis grade  |             |    |                |     |                |     |            |     |
| I                   | 34          | 9  | 17             | 17  | 16             | 10  | 0          | 0   |
| II                  | 172         | 46 | 54             | 52  | 86             | 52  | 28         | 27  |
| III                 | 170         | 45 | 32             | 31  | 63             | 38  | 75         | 73  |
| Missing cases = 3   |             |    |                |     |                |     |            |     |
| Nodal status        |             |    |                |     |                |     |            |     |
| Positive            | 221         | 59 | 0              | 0   | 167            | 100 | 54         | 52  |
| Negative            | 153         | 41 | 104            | 100 | 0              | 0   | 49         | 48  |
| Missing cases = 5   |             |    |                |     |                |     |            |     |
| Tumor Size          |             |    |                |     |                |     |            |     |
| < 20mm              | 167         | 44 | 59             | 57  | 66             | 40  | 37         | 36  |
| ≥ 20mm              | 209         | 56 | 44             | 43  | 100            | 60  | 65         | 64  |
| Missing cases = 3   |             |    |                |     |                |     |            |     |
| Age at menopause    |             |    |                |     |                |     |            |     |
| < 50                | 65          | 37 | 18             | 35  | 26             | 37  | 19         | 39  |
| ≥ 50                | 110         | 63 | 33             | 65  | 45             | 63  | 30         | 61  |
| Missing cases = 204 |             |    |                |     |                |     |            |     |
| Systematic adjuvant |             |    |                |     |                |     |            |     |
| None                | 2           | 1  | 1              | 1   | 0              | 0   | 1          | 1   |
| Chemotherapy        | 269         | 38 | 38             | 22  | 133            | 32  | 98         | 87  |
| Endocrine therapy   | 269         | 38 | 98             | 58  | 158            | 38  | 8          | 7   |
| Both                | 163         | 23 | 33             | 19  | 124            | 30  | 6          | 5   |
| Ki67*               |             |    |                |     |                |     |            |     |
| < 16                | 184         | 49 | 65             | 62  | 96             | 57  | 18         | 17  |
| ≥ 16                | 195         | 51 | 39             | 38  | 71             | 43  | 85         | 83  |
| IHC subgroups**     |             |    |                |     |                |     |            |     |
| Luminal A-like      | 152         | 40 | 61             | 59  | 86             | 51  | 0          | 0   |
| Luminal B-like      | 82          | 22 | 33             | 32  | 49             | 29  | 0          | 0   |
| Her2 positive       | 79          | 21 | 10             | 9   | 32             | 19  | 37         | 36  |
| Triple negative     | 66          | 17 | 0              | 0   | 0              | 0   | 66         | 64  |
| GGI                 |             |    |                |     |                |     |            |     |
| Grade 1             | 134         | 35 | 51             | 49  | 68             | 41  | 11         | 11  |
| Grade 3             | 245         | 65 | 53             | 51  | 99             | 59  | 92         | 89  |
| 70-Gene             |             |    |                |     |                |     |            |     |
| Good                | 174         | 46 | 68             | 65  | 94             | 56  | 7          | 7   |
| Poor                | 205         | 54 | 36             | 35  | 73             | 44  | 96         | 93  |
| CCS                 |             |    |                |     |                |     |            |     |
| Low                 | 73          | 19 | 30             | 29  | 35             | 21  | 6          | 6   |
| Intermediate        | 80          | 21 | 23             | 22  | 44             | 26  | 10         | 10  |
| High                | 226         | 60 | 51             | 49  | 88             | 53  | 87         | 84  |
| RS                  |             |    |                |     |                |     |            |     |
| Low                 | 76          | 20 | 41             | 39  | 34             | 20  | 0          | 0   |
| Intermediate        | 45          | 12 | 14             | 13  | 27             | 16  | 1          | 1   |
| High                | 258         | 68 | 49             | 47  | 106            | 63  | 102        | 99  |
| PAM50               |             |    |                |     |                |     |            |     |
| Luminal A           | 126         | 33 | 54             | 52  | 66             | 40  | 2          | 2   |
| Luminal B           | 78          | 21 | 27             | 26  | 50             | 30  | 1          | 1   |
| Her2-enriched       | 53          | 14 | 3              | 3   | 23             | 14  | 27         | 26  |
| Basal-like          | 92          | 24 | 12             | 12  | 11             | 6   | 69         | 67  |
| Normal-like         | 30          | 8  | 8              | 7   | 17             | 10  | 4          | 4   |

# = Number of patients, % = Percentage, ER = estrogen receptor alpha, PR = progesterone receptor, RS = Recurrence score, CCS = Cell cycle score, \* = Ki67 cut-off (median value), \*\* = Luminal A (ER+, PR+/PR-, HER-, Ki67 low), Luminal A (ER+, PR+/PR-, HER-, Ki67 High), Her2 like(HER2+), Basal like (ER-, PR-, HER2-)

**Supplementary table S4.**

**Change in C-index when adding gene expression signatures to Ki67/IHC for All, ER+/LN-, ER+/LN+, ER- patients in Cohorts 1 and 2.**

| Models               | All                 |                     | ER+ / LN-           |                     | ER+ / LN+           |                    | ER-                 |                    |
|----------------------|---------------------|---------------------|---------------------|---------------------|---------------------|--------------------|---------------------|--------------------|
|                      | Cohort 1<br>(n=379) | Cohort 2<br>(n=209) | Cohort 1<br>(n=104) | Cohort 2<br>(n=115) | Cohort 1<br>(n=167) | Cohort 2<br>(n=65) | Cohort 1<br>(n=103) | Cohort 2<br>(n=24) |
|                      | C-Index             |                     | C-Index             |                     | C-Index             |                    | C-Index             |                    |
| <b>Univariate</b>    |                     |                     |                     |                     |                     |                    |                     |                    |
| Ki67                 | 0.57                | 0.59                | 0.58                | 0.58                | 0.59                | 0.54               | 0.52                | 0.57               |
| IHC                  | 0.61                | 0.59                | 0.59                | 0.56                | 0.60                | 0.54               | 0.59                | 0.55               |
| GGI                  | 0.57                | 0.61                | 0.59                | 0.59                | 0.61                | 0.56               | 0.54                | 0.68               |
| 70-Gene              | 0.57                | 0.61                | 0.51                | 0.55                | 0.61                | 0.60               | 0.50                | 0.55               |
| RS                   | 0.60                | 0.61                | 0.63                | 0.60                | 0.62                | 0.57               | 0.51                | 0.52               |
| CCS                  | 0.57                | 0.62                | 0.57                | 0.57                | 0.62                | 0.62               | 0.54                | 0.71               |
| PAM50                | 0.63                | 0.64                | 0.61                | 0.66                | 0.65                | 0.62               | 0.59                | 0.54               |
|                      | C-Index             |                     | C-Index             |                     | C-Index             |                    | C-Index             |                    |
| <b>Ki67 + G.Sigs</b> |                     |                     |                     |                     |                     |                    |                     |                    |
| Ki67 + GGI           | 0.59                | 0.62                | 0.61                | 0.60                | 0.62                | 0.57               | 0.56                | 0.70               |
| Ki67 + 70-Gene       | 0.59                | 0.62                | 0.59                | 0.59                | 0.63                | 0.61               | 0.50                | 0.58               |
| Ki67 + RS            | 0.61                | 0.62                | 0.63                | 0.64                | 0.63                | 0.57               | 0.52                | 0.57               |
| Ki67 + CCS           | 0.59                | 0.63                | 0.60                | 0.59                | 0.63                | 0.63               | 0.55                | 0.72               |
| Ki67 + PAM50         | 0.63                | 0.64                | 0.66                | 0.66                | 0.66                | 0.62               | 0.59                | 0.56               |
| <b>IHC + G.Sigs</b>  |                     |                     |                     |                     |                     |                    |                     |                    |
| IHC + GGI            | 0.63                | 0.63                | 0.61                | 0.58                | 0.64                | 0.57               | 0.60                | 0.70               |
| IHC + 70-Gene        | 0.62                | 0.62                | 0.60                | 0.58                | 0.64                | 0.61               | 0.59                | 0.60               |
| IHC + RS             | 0.64                | 0.62                | 0.64                | 0.64                | 0.64                | 0.57               | 0.59                | 0.58               |
| IHC + CCS            | 0.62                | 0.63                | 0.60                | 0.56                | 0.64                | 0.63               | 0.60                | 0.73               |
| IHC + PAM50          | 0.64                | 0.64                | 0.65                | 0.68                | 0.67                | 0.62               | 0.61                | 0.60               |

C-Index = Concordance index, ER = Estrogen receptor, LN = Lymph node metastasis, GGI = Genomic grade index, RS = Recurrence score, CCS = Cell cycle score, G.sigs = Gene expression signatures, IHC = Immunohistochemical markers

**Supplementary Table S5.**  
**Clinico-pathological characteristics of patient subgroups in cohort 2**

| Variables                   | All (n=209) |    | ER+/LN- (n=115) |     | ER+/LN+ (n=65) |     | ER- (n=24) |     |
|-----------------------------|-------------|----|-----------------|-----|----------------|-----|------------|-----|
|                             | #           | %  | #               | %   | #              | %   | #          | %   |
| ER                          |             |    |                 |     |                |     |            |     |
| Positive                    | 185         | 89 | 115             | 100 | 65             | 100 | 0          | 0   |
| Negative                    | 24          | 11 | 0               | 0   | 0              | 0   | 24         | 100 |
| PR                          |             |    |                 |     |                |     |            |     |
| Positive                    | 175         | 84 | 106             | 92  | 56             | 86  | 8          | 33  |
| Negative                    | 34          | 16 | 9               | 8   | 9              | 14  | 16         | 67  |
| HER2                        |             |    |                 |     |                |     |            |     |
| Positive                    | 40          | 19 | 16              | 14  | 10             | 15  | 13         | 54  |
| Negative                    | 169         | 81 | 99              | 86  | 55             | 85  | 11         | 46  |
| Elston-Ellis grade          |             |    |                 |     |                |     |            |     |
| I                           | 56          | 27 | 45              | 39  | 8              | 12  | 2          | 8   |
| II                          | 111         | 54 | 60              | 53  | 40             | 63  | 8          | 34  |
| III                         | 40          | 19 | 9               | 8   | 16             | 25  | 14         | 58  |
| Missing cases = 2           |             |    |                 |     |                |     |            |     |
| Nodal status                |             |    |                 |     |                |     |            |     |
| Positive                    | 74          | 36 | 0               | 0   | 65             | 100 | 9          | 39  |
| Negative                    | 129         | 64 | 115             | 100 | 0              | 0   | 14         | 61  |
| Missing cases = 6           |             |    |                 |     |                |     |            |     |
| Tumor Size                  |             |    |                 |     |                |     |            |     |
| < 20mm                      | 90          | 43 | 66              | 57  | 16             | 24  | 7          | 29  |
| ≥ 20mm                      | 119         | 57 | 49              | 43  | 49             | 76  | 17         | 71  |
| Age                         |             |    |                 |     |                |     |            |     |
| < 50                        | 39          | 19 | 20              | 17  | 15             | 23  | 4          | 17  |
| ≥ 50                        | 170         | 81 | 95              | 83  | 50             | 77  | 20         | 83  |
| Systematic adjuvant therapy |             |    |                 |     |                |     |            |     |
| None                        | 113         | 54 | 99              | 86  | 1              | 1   | 12         | 50  |
| Chemotherapy                | 19          | 9  | 1               | 1   | 15             | 23  | 3          | 12  |
| Endocrine therapy           | 72          | 35 | 15              | 13  | 45             | 69  | 9          | 38  |
| Both                        | 4           | 2  | 0               | 0   | 4              | 7   | 0          | 0   |
| Missing cases = 6           |             |    |                 |     |                |     |            |     |
| Ki67                        |             |    |                 |     |                |     |            |     |
| < 16                        | 140         | 67 | 91              | 79  | 37             | 56  | 9          | 38  |
| ≥ 16                        | 69          | 33 | 24              | 21  | 28             | 44  | 15         | 62  |
| IHC subtypes**              |             |    |                 |     |                |     |            |     |
| Luminal A-like              | 121         | 58 | 86              | 75  | 33             | 51  | 0          | 0   |
| Luminal B-like              | 37          | 18 | 13              | 11  | 22             | 34  | 0          | 0   |
| Her2 positive               | 40          | 19 | 16              | 14  | 10             | 15  | 13         | 54  |
| Triple negative             | 11          | 5  | 0               | 0   | 0              | 0   | 11         | 46  |
| Missing cases = 6           |             |    |                 |     |                |     |            |     |
| GGI                         |             |    |                 |     |                |     |            |     |
| Grade 1                     | 139         | 67 | 91              | 79  | 38             | 58  | 7          | 29  |
| Grade 3                     | 70          | 33 | 24              | 21  | 27             | 42  | 17         | 71  |
| 70-Gene                     |             |    |                 |     |                |     |            |     |
| Good                        | 110         | 53 | 79              | 69  | 26             | 40  | 2          | 8   |
| Poor                        | 99          | 47 | 36              | 31  | 39             | 60  | 22         | 92  |
| CCS                         |             |    |                 |     |                |     |            |     |
| Low                         | 114         | 55 | 77              | 67  | 30             | 46  | 5          | 21  |
| Intermediate                | 48          | 23 | 20              | 17  | 20             | 31  | 7          | 29  |
| High                        | 47          | 22 | 18              | 16  | 15             | 23  | 12         | 50  |
| RS                          |             |    |                 |     |                |     |            |     |
| Low                         | 78          | 37 | 58              | 50  | 18             | 28  | 0          | 0   |
| Intermediate                | 40          | 19 | 25              | 22  | 14             | 21  | 1          | 4   |
| High                        | 91          | 44 | 32              | 28  | 33             | 51  | 23         | 96  |
| PAM50                       |             |    |                 |     |                |     |            |     |
| Luminal A                   | 57          | 27 | 40              | 35  | 15             | 24  | 1          | 4   |
| Luminal B                   | 45          | 22 | 25              | 22  | 17             | 26  | 0          | 0   |
| Her2-enriched               | 48          | 23 | 15              | 13  | 17             | 26  | 16         | 67  |
| Basal-like                  | 23          | 11 | 8               | 7   | 8              | 12  | 7          | 29  |
| Normal-like                 | 36          | 17 | 27              | 23  | 8              | 12  | 0          | 0   |

# = Number of patients, % = Percentage, ER = estrogen receptor alpha, PR = progesterone receptor, RS = Recurrence score, CCS = Cell cycle score, \*\* = Luminal A (ER+, PR+/PR-, HER-, Ki67 low), Luminal A (ER+, PR+/PR-, HER-, Ki67 High), Her2 like (HER2+), Basal like (ER-, PR-, HER2-)
